# Supplementary material
Source: PubMed Central journal article supplement (PMC2652961)
Supplement: supp_61_10_853__1.pdf [file supp_61_10_853__1.pdf]

**Table 3. Results of study coding of multilevel investigations of area effects on self-rated health, cardiovascular morbidity and risk factors, and mortality among adults.**

| Self-rated health                          |                                   |                                                   |                                        |                                                                                                                      |                                          |                                                                                                                                                                                                                                                                                                                                                   |                              |                                          |                                                                                                                                                                                                                                                                                                                                                                                                                   |
|--------------------------------------------|-----------------------------------|---------------------------------------------------|----------------------------------------|----------------------------------------------------------------------------------------------------------------------|------------------------------------------|---------------------------------------------------------------------------------------------------------------------------------------------------------------------------------------------------------------------------------------------------------------------------------------------------------------------------------------------------|------------------------------|------------------------------------------|-------------------------------------------------------------------------------------------------------------------------------------------------------------------------------------------------------------------------------------------------------------------------------------------------------------------------------------------------------------------------------------------------------------------|
| Citation /location                         | Health Outcome /Analytic variable | Design/year of data collection (individual level) | Individual sample size (sex/age range) | Individual characteristics adjusted for                                                                              | Area sample size                         | Area-level exposures                                                                                                                                                                                                                                                                                                                              | Crude between area variation | Adjusted between area variation          | Significant adjusted area effects                                                                                                                                                                                                                                                                                                                                                                                 |
| <b>Béland (2002)</b> <sup>41</sup> /Canada | Self-rated health (0/1)           | Cross-sectional/ 1987                             | 9422<br>66% Men<br>≥ 15y               | A, S, E, I, ES, OS, MS, Stressful events, Perceived stress, SN, Social support, Locus of control, Sense of coherence | 361 Contexts (Clusters of census tracts) | Unemployment rate <sup>d</sup> , Gender distribution <sup>d</sup> , Age group distribution <sup>d</sup> , % Without high school diploma <sup>d</sup> , % Immigrants <sup>d</sup> , % Two-parent families <sup>d</sup> , Average household income <sup>d</sup> , Labour force participation rate <sup>d</sup> , Occupational status <sup>d</sup> . | VC (Se) = 0.049 (0.015)      | NS (Adjusted also for area unemployment) | <ul style="list-style-type: none"> <li>- Greater % of two-parent families, higher average income, and lower % of immigrants were associated with better SRH.</li> <li>- Cross-level interaction: Detrimental effect of deprivation on SRH was greater among those with greater perceived stress.</li> </ul>                                                                                                       |
| <b>Blakely (2000)</b> <sup>42</sup> /USA   | Self-rated health (0/1)           | Cross-sectional/ 1995; 1997                       | 213695<br>% Men NR<br>≥ 15y            | S, R/E, I<br>Age-specific analyses                                                                                   | 50 States                                | Median household income <sup>d</sup> , Income inequality/Gini coefficient <sup>1</sup> .<br><br>For 5 different time periods                                                                                                                                                                                                                      | NR                           | NR                                       | <ul style="list-style-type: none"> <li>- Greater inequality was associated with poorer SRH in the ≥ 45 y group.</li> <li>- In the ≥ 45 y group, the association between SRH and income inequality was stronger for earlier measures of inequality (1979-1981) than for concurrent measures (1995-1997).</li> </ul>                                                                                                |
| <b>Blakely (2001)</b> <sup>43</sup> /USA   | Self-rated health (0/1)           | Cross-sectional/ 1995; 1997                       | 279066<br>48% Men<br>> 25y             | A, S, R/E, I                                                                                                         | 50 States                                | Voting inequality <sup>d</sup> , Voting turnout <sup>d</sup> , Median Income <sup>d</sup> , Income inequality/Gini coefficient <sup>1</sup> .                                                                                                                                                                                                     | NR                           | NR                                       | <ul style="list-style-type: none"> <li>- Greater voting inequality, lower voter turnout, higher income inequality, and lower median income were associated with poorer SRH.</li> <li>- Cross-level interaction: Effect of income inequality was greater in the ≥ 45 y group.</li> <li>- Living in more equitable states was associated with better SRH among Whites, but only marginally among Blacks.</li> </ul> |
| <b>Blakely (2002)</b> <sup>44</sup>        | Self-rated health (0/1)           | Cross-sectional/                                  | 185479<br>48% men                      | A, S, R/E, I                                                                                                         | 232 Metropolitan                         | All area units: Income inequality/Gini                                                                                                                                                                                                                                                                                                            | NR                           | NR                                       | <ul style="list-style-type: none"> <li>- At the MA, county and state levels, lower income and higher income</li> </ul>                                                                                                                                                                                                                                                                                            |

|                                              |                         |                                                     |                          |                                                                                                                                         |                                          |                                                                                                                                                                                                                                                                                                                                                                                                                           |                                       |                                            |  |                                                                                                                                                                                                                                                                                                                                                                                             |
|----------------------------------------------|-------------------------|-----------------------------------------------------|--------------------------|-----------------------------------------------------------------------------------------------------------------------------------------|------------------------------------------|---------------------------------------------------------------------------------------------------------------------------------------------------------------------------------------------------------------------------------------------------------------------------------------------------------------------------------------------------------------------------------------------------------------------------|---------------------------------------|--------------------------------------------|--|---------------------------------------------------------------------------------------------------------------------------------------------------------------------------------------------------------------------------------------------------------------------------------------------------------------------------------------------------------------------------------------------|
| /USA                                         |                         | 1996; 1998                                          | ≥ 0y                     |                                                                                                                                         | areas (MAs)<br>216 Counties<br>50 States | coefficient <sup>1</sup> ,<br>Average household<br>income <sup>d</sup> .<br><br>MAs: Cost of living index <sup>d</sup> .<br><br>Counties: Population size <sup>d</sup> .                                                                                                                                                                                                                                                  |                                       |                                            |  | inequality were associated with poorer SRH, but in separate models only; adjusting for the cost of living index at the household level strengthened the association between MA average income and SRH, but did not change the inequality association.<br>- Cross-level interaction: Association between state income inequality and poorer SRH was stronger among residents of rural areas. |
| <b>Browning (2002)</b> <sup>45</sup><br>/USA | Self-rated health (ord) | Cross-sectional/<br>1997; 1999                      | 2218<br>42% Men<br>≥ 18y | A, S, I, E, R/E,<br>MS, Foreign born, Insurance coverage, Health behaviours, Health problems, Years of n'hood residency, Interview year | 333<br>Neighbourhood clusters            | Concentrated disadvantage <sup>d</sup> , Residential stability <sup>d</sup> , Immigrant concentration <sup>d</sup> , Collective efficacy <sup>d</sup> , Prior neighbourhood health <sup>d</sup> , Violent victimization <sup>d</sup> .                                                                                                                                                                                    | VC = 0.189<br>ICC = 0.054<br>p < 0.01 | VC = 0.178<br>p < 0.01                     |  | - Higher levels of collective efficacy associated with better SRH.<br>- Cross-level interaction: The protective effect of individual education was greater in areas with higher collective efficacy.                                                                                                                                                                                        |
| <b>Browning (2003)</b> <sup>46</sup><br>/USA | Self-rated health (0/1) | Cross-sectional/<br>1995; 1997;<br>1999             | 3272<br>41% Men<br>≥ 18y | A, S, I, E, R/E,<br>MS, Foreign born, Insurance coverage, Years of n'hood residency, PA, Weight problems, Smoking, Interview year       | 339<br>Neighbourhood clusters            | Affluence <sup>d</sup> , Poverty <sup>d</sup> , Residential stability <sup>d</sup> , Immigrant concentration <sup>d</sup> .<br><br>Hypothesised pathways - Collective efficacy <sup>d</sup> , Social support and sociability <sup>d</sup> , Subcultural tolerance for risk behaviour/anomie <sup>d</sup> , Neighbourhood disorder <sup>1</sup> , Prior neighbourhood health <sup>d</sup> , Population size <sup>d</sup> . | ICC=0.060<br>SNR                      | NS                                         |  | - Greater affluence and lower levels of collective efficacy were associated with better SRH.<br>- Greater residential stability and population size were associated with poorer SRH.<br>- Area-level interaction: As area affluence increased, the positive effect of residential stability on poorer SRH decreased.                                                                        |
| <b>Browning (2003)</b> <sup>47</sup><br>/USA | Self-rated health (0/1) | Cross-sectional/<br>Pooled survey data<br>1991-1999 | 8706<br>49% Men<br>≥ 18y | A, S, R/E, E, I,<br>MS, Housing tenure, Interview year                                                                                  | 342<br>Neighbourhood clusters            | Affluence <sup>d</sup> , Poverty <sup>d</sup> , Residential stability <sup>d</sup> , Immigrant concentration <sup>d</sup> .                                                                                                                                                                                                                                                                                               | 6.0%<br>(p < 0.001)                   | NS<br>(Adjusted also for area across time) |  | - Greater affluence was associated with better SRH.                                                                                                                                                                                                                                                                                                                                         |

|                                                            |                         |                                                                                                 |                             |                                                                                                                                                                 |                                                  |                                                                                                                                                                                                                                                                                                                                                                                                                                                                                           |                             |                             |                                                                                                                                                                                                                                                                                                                                                                                                                                                                                                                                       |
|------------------------------------------------------------|-------------------------|-------------------------------------------------------------------------------------------------|-----------------------------|-----------------------------------------------------------------------------------------------------------------------------------------------------------------|--------------------------------------------------|-------------------------------------------------------------------------------------------------------------------------------------------------------------------------------------------------------------------------------------------------------------------------------------------------------------------------------------------------------------------------------------------------------------------------------------------------------------------------------------------|-----------------------------|-----------------------------|---------------------------------------------------------------------------------------------------------------------------------------------------------------------------------------------------------------------------------------------------------------------------------------------------------------------------------------------------------------------------------------------------------------------------------------------------------------------------------------------------------------------------------------|
| <b>Cagney (2005)</b> <sup>48</sup><br>/USA                 | Self-rated health (ord) | Cross-sectional/<br>1995; 1997;<br>1999                                                         | 636<br>35% Men<br>≥ 55y     | A, S, R/E, I, E,<br>MS, Insurance<br>coverage, PA,<br>Weight<br>problems,<br>Interview year                                                                     | 246<br>Neighbourhood<br>clusters                 | Age structure <sup>d</sup> ,<br>Affluence <sup>d</sup> ,<br>Poverty <sup>d</sup> ,<br>Residential stability <sup>d</sup> ,<br><br>Hypothesised pathway:<br>Collective efficacy <sup>d</sup> .                                                                                                                                                                                                                                                                                             | NR                          | NR                          | <ul style="list-style-type: none"> <li>- Greater affluence was associated with lower odds of poorer SRH</li> <li>- Greater residential stability was associated with greater odds of reporting poorer SRH.</li> <li>- Area-level interaction: The detrimental effect of residential stability on SRH decreased as affluence increased.</li> </ul>                                                                                                                                                                                     |
| <b>Craig (2005)</b> <sup>49</sup><br>/UK                   | Self-rated health (0/1) | Cross-sectional/<br>1999/2000                                                                   | 18466<br>% Men NR<br>16-64y | A, S, E, ES                                                                                                                                                     | 32 Local<br>authorities                          | Mean household income <sup>d</sup> ,<br>Income inequality<br>/Gini coefficient <sup>i</sup><br>/Theil index <sup>i</sup> ,<br>/90/10 ratio <sup>i</sup> .                                                                                                                                                                                                                                                                                                                                 | VC (Se)<br>0.015<br>(0.006) | VC (Se)<br>0.019<br>(0.007) | <ul style="list-style-type: none"> <li>- Lower income was associated with poorer SRH.</li> </ul>                                                                                                                                                                                                                                                                                                                                                                                                                                      |
| <b>Cummins (2005)</b> <sup>50</sup><br>/UK                 | Self-rated health (0/1) | Cross-sectional/<br>Pooled data<br>from two<br>surveys<br>1: 1994-<br>1999;<br>2: 1995;<br>1998 | 13899<br>45% Men<br>≥ 16y   | A, S, SC, ES                                                                                                                                                    | 425 Postcode<br>sectors                          | Unemployment <sup>d</sup> ,<br>Physical quality of<br>residential environment <sup>i</sup> ,<br>Public recreation <sup>i</sup> ,<br>Crime <sup>i</sup> ,<br>Access to multiple owned<br>food shops <sup>i</sup> ,<br>Access to banks and<br>building societies <sup>i</sup> ,<br>Health services <sup>i</sup> ,<br>Left wing political<br>climate <sup>i</sup> ,<br>Political engagement <sup>i</sup><br>Access to private<br>transport <sup>i</sup> ,<br>Transport wealth <sup>i</sup> . | NR                          | NR                          | <ul style="list-style-type: none"> <li>- Poorer physical quality of residential environment, more left wing political climate, lower political engagement, higher unemployment, lower access to private transport, and lower transport wealth were associated with poorer SRH.</li> <li>- Cross-level interaction: Area effects for physical quality of residential environments, left wing political climate, access to private transport, and transport wealth on poorer SRH were greater among non-working individuals.</li> </ul> |
| <b>Drukker (2003)</b> <sup>51</sup><br>/The<br>Netherlands | Self-rated health (0/1) | Cross-sectional/<br>Year NR                                                                     | 3394<br>48% Men<br>20-65y   | A, S, ES,<br>Welfare<br>recipient,<br>Family type.<br><br>Hypothesised<br>pathway -<br>Lifestyle:<br>Smoking, PA,<br>Drinking<br>Fruit/vegetable<br>intake, BMI | 35 City-defined<br>residential<br>neighbourhoods | Composite index of socio-<br>economic deprivation <sup>d</sup> ,<br>Residential stability <sup>d</sup> .<br><br>Hypothesised pathways -<br>Housing conditions<br>(person-bedroom index,<br>residential type) <sup>d</sup> ,<br>Individual perceptions<br>of housing conditions <sup>d</sup> ,<br>of area characteristics <sup>d</sup> ,<br>of neighbourhood social<br>contacts, maintenance,<br>cosines, safety <sup>d</sup> .                                                            | NR                          | NR                          | <ul style="list-style-type: none"> <li>- Greater deprivation was associated with poorer SRH.</li> <li>- When further adjusting for lifestyle, housing conditions, and perception of housing and neighbourhood contexts, the effect of deprivation on SRH was no longer significant.</li> </ul>                                                                                                                                                                                                                                        |
| <b>Drukker</b>                                             | Self-rated              | Cross-                                                                                          | 3469                        | A, S, E, ES,                                                                                                                                                    | 35 City-defined                                  | Composite index of socio-                                                                                                                                                                                                                                                                                                                                                                                                                                                                 | NR                          | NR                          | <ul style="list-style-type: none"> <li>- No significant main area effects.</li> </ul>                                                                                                                                                                                                                                                                                                                                                                                                                                                 |

|                                                 |                             |                             |                                                   |                                                                                                                                     |                               |                                                                                                                                                                                                                                                                                                                                                        |                           |                           |                                                                                                                                                                                                                                                                                                      |
|-------------------------------------------------|-----------------------------|-----------------------------|---------------------------------------------------|-------------------------------------------------------------------------------------------------------------------------------------|-------------------------------|--------------------------------------------------------------------------------------------------------------------------------------------------------------------------------------------------------------------------------------------------------------------------------------------------------------------------------------------------------|---------------------------|---------------------------|------------------------------------------------------------------------------------------------------------------------------------------------------------------------------------------------------------------------------------------------------------------------------------------------------|
| <b>(2005)</b> <sup>52</sup><br>/The Netherlands | health (0/1)                | sectional/<br>Year NR       | 48% Men<br>20-65y                                 | Years of<br>n'hood<br>residency,<br>Welfare<br>recipient,<br>Family type                                                            | residential<br>neighbourhoods | economic deprivation <sup>d</sup> ,<br>Residential stability <sup>d</sup> .                                                                                                                                                                                                                                                                            |                           |                           | - Area-level interaction: In stable and very stable areas, higher deprivation was associated with poorer SRH                                                                                                                                                                                         |
| <b>Franzini (2005)</b> <sup>53</sup><br>/USA    | Self-rated<br>health (cont) | Cross-sectional/<br>2001/02 | 3171<br>25% Men<br>18-94y                         | A, S, R/E,<br>SES,<br>Years of<br>n'hood<br>residency<br><br>Hypothesised<br>pathways –<br>Physical<br>activity;<br>Social support. | 100 Census<br>block groups    | Index of neighbourhood<br>impoverishment <sup>d</sup> ,<br><br>Hypothesised pathways –<br>Collective efficacy <sup>d</sup> ,<br>Physical and social<br>disorder <sup>i, d</sup> ,<br>Social processes relevant<br>to children <sup>d</sup> ,<br>N'hood racism <sup>d</sup> ,<br>Social capital <sup>d</sup> ,<br>N'hood climate of fear <sup>d</sup> . | ICC = 0.17<br>Sign        | ICC = 0.19<br>Sign        | - Greater impoverishment was associated with poorer SRH.<br>- Lower social capital, and greater levels of disorder and racism were associated with poorer SRH and mediated the effect of deprivation on SRH (which became non-significant).                                                          |
| <b>Gee (2002)</b> <sup>54</sup><br>/USA         | Self-rated<br>health (cont) | Cross-sectional/<br>1993/94 | 1503<br>Chinese<br>American<br>% Men NR<br>18-65y | A, S, E, I, ES,<br>SN, Medical<br>insurance,<br>Acculturation,<br>Perceived<br>racial<br>discrimination                             | 36 Census tracts              | Poverty <sup>d</sup> ,<br>Median housing value <sup>i</sup> ,<br>Index of dissimilarity<br>(greater segregation of<br>Chinese) <sup>d</sup> ,<br>Redlined areas<br>(disfavoured home<br>mortgage loan<br>applicants) <sup>i</sup> .                                                                                                                    | NR                        | NR                        | - Residing in redlined areas was associated with better SRH.                                                                                                                                                                                                                                         |
| <b>Gee (2004)</b> <sup>55</sup><br>/USA         | Self-rated<br>health (cont) | Cross-sectional/<br>1993/94 | 1503<br>Chinese<br>American<br>47% Men<br>18-65y  | A, S, E, I, ES,<br>SN,<br>Acculturation,<br>Perceived<br>traffic stress,<br>Perceived<br>environment                                | 36 Census tracts              | Poverty <sup>d</sup> ,<br>Vehicular burden <sup>d</sup> .                                                                                                                                                                                                                                                                                              | ICC = 0.03<br>SNR         | NR                        | - Greater poverty was associated with poorer SRH.<br>- Cross-level interaction: Greater vehicular burden was associated with poorer SRH among those perceiving higher levels of traffic stress; when adjusting for this cross-level interaction, effect of poverty on SRH was no longer significant. |
| <b>Hopman (2003)</b> <sup>56</sup><br>/Canada   | Self-rated<br>health (NR)   | Cross-sectional/<br>1996/97 | 9423<br>31% Men<br>≥ 25y                          | A, S                                                                                                                                | 9 Cities                      | None                                                                                                                                                                                                                                                                                                                                                   | NS                        | NS                        | - Examined between area variation only.                                                                                                                                                                                                                                                              |
| <b>Hou (2003)</b> <sup>57</sup><br>/Canada      | Self-rated<br>health (cont) | Cross-sectional/<br>1996/97 | 8862<br>49% Men<br>≥ 12y                          | A, S, I, E,<br>Smoking, PA,<br>Emotional<br>support                                                                                 | 798 Census<br>tracts          | % Low-income <sup>d</sup> ,<br>Income inequality/<br>Coefficient of variation <sup>i</sup> .                                                                                                                                                                                                                                                           | VC = 0.042<br>(p ≤ 0.001) | VC = 0.036<br>(p ≤ 0.001) | - Higher % of low income associated with poorer SRH.<br>- Higher income inequality associated with better SRH.                                                                                                                                                                                       |
| <b>Hou (2005)</b> <sup>58</sup>                 | Self-rated                  | Cross-                      | 34592                                             | A, S, R/E, E, I,                                                                                                                    | 487 Census                    | Census tracts:                                                                                                                                                                                                                                                                                                                                         | NR                        | NR                        | - At the census tract level, higher income                                                                                                                                                                                                                                                           |

|                                                      |                            |                                               |                           |                                                              |                                                     |                                                                                                                                                                                                                                                                                                                                                                                                                                                                                                                                                                                |                                                                                                                 |                                                                                                                                     |                                                                                                                                                                                                                                         |
|------------------------------------------------------|----------------------------|-----------------------------------------------|---------------------------|--------------------------------------------------------------|-----------------------------------------------------|--------------------------------------------------------------------------------------------------------------------------------------------------------------------------------------------------------------------------------------------------------------------------------------------------------------------------------------------------------------------------------------------------------------------------------------------------------------------------------------------------------------------------------------------------------------------------------|-----------------------------------------------------------------------------------------------------------------|-------------------------------------------------------------------------------------------------------------------------------------|-----------------------------------------------------------------------------------------------------------------------------------------------------------------------------------------------------------------------------------------|
| /Canada                                              | health (ord)               | sectional/<br>1996/97                         | 47% Men<br>≥ 12y          | Immigrant<br>status                                          | tracts<br>25 Census<br>metropolitan<br>areas (CMAs) | Income inequality:<br>/Gini index <sup>i</sup> ,<br>/Median share <sup>i</sup> ,<br>/Mean logarithmic <sup>i</sup> ,<br>/Theil index <sup>i</sup> ,<br>/Squared coefficient of<br>variation <sup>i</sup> ;<br>Median income <sup>d</sup> ,<br>% Adults <sup>d</sup> ,<br>% University degree <sup>d</sup> ,<br>% Seniors <sup>d</sup> ,<br>% Single parent families <sup>d</sup> ,<br>% Recent immigrants <sup>d</sup> ,<br>% Non-white <sup>d</sup> .<br><br>CMAs:<br>Income inequality <sup>i</sup> ,<br>Economic segregation <sup>d</sup> ,<br>Median income <sup>d</sup> . |                                                                                                                 |                                                                                                                                     | and % of people with a university<br>degree were associated with better<br>SRH; greater % of single parent family<br>was associated with poorer SRH.<br>- At the CMA level, within-CMA<br>inequality positively associated with<br>SRH. |
| <b>Karlsen<br/>(2002)</b> <sup>59</sup><br>/UK       | Self-rated<br>health (0/1) | Cross-<br>sectional/<br>1993/94               | 7848<br>% Men NR<br>≥ 16y | A, S, SC<br><br>Race/ethnicity<br>specific<br>analyses       | 250 Electoral<br>wards                              | Townsend deprivation<br>index <sup>d</sup> ,<br>Ethnic group density <sup>d</sup> ,<br>Individual perceptions<br>of problems of crime and<br>nuisance <sup>d</sup> ,<br>of lack of amenities <sup>d</sup> ,<br>of environmental<br>problems <sup>d</sup> .                                                                                                                                                                                                                                                                                                                     | OR (95%CI)<br>Whites: NS<br>Caribbean:<br>NS<br>Indian: NS<br>Pakistani/<br>Bangladeshi:<br>1.39<br>(1.16-1.67) | OR (95%CI)<br>Whites: NS<br>Caribbean:<br>NS<br>Indian:<br>1.17<br>(1.03-1.33)<br>Pakistani/<br>Bangladeshi:<br>1.60<br>(1.25-2.03) | - Lower % of ethnic minority was<br>associated with poorer SRH among<br>Whites only.                                                                                                                                                    |
| <b>Lindström<br/>(2004)</b> <sup>60</sup><br>/Sweden | Self-rated<br>health (0/1) | Cross-<br>sectional/<br>1994                  | 3602<br>49% Men<br>20-80y | A, S, E,<br>Foreign born,<br>Social<br>participation         | 75 City-defined<br>administrative<br>areas          | None                                                                                                                                                                                                                                                                                                                                                                                                                                                                                                                                                                           | VC (Se) =<br>0.096<br>(0.043)<br>ICC = 2.8%                                                                     | NS                                                                                                                                  | - Examined between area variation only.                                                                                                                                                                                                 |
| <b>Malmström<br/>(1999)</b> <sup>61</sup><br>/Sweden | Self-rated<br>health (0/1) | Cross-<br>sectional/<br>1988/89               | 9240<br>50% Men<br>25-74y | A, S, E, BMI,<br>Smoking, PA                                 | 837 Small-area<br>market statistics                 | Care Need Index of<br>deprivation <sup>d</sup> ,<br>Townsend Deprivation<br>Index <sup>d</sup> .                                                                                                                                                                                                                                                                                                                                                                                                                                                                               | NR                                                                                                              | NR                                                                                                                                  | - Greater deprivation (both measures)<br>was associated with poorer SRH.                                                                                                                                                                |
| <b>Mc Culloch<br/>(2001)</b> <sup>62</sup><br>/UK    | Self-rated<br>health (0/1) | Cross-<br>sectional/<br>Pooled<br>survey data | 10264<br>47% Men<br>≥ 16y | E, ES, R/E,<br>Region of<br>residence, Year<br>of interview, | 634 Wards                                           | Townsend index of<br>deprivation <sup>d</sup>                                                                                                                                                                                                                                                                                                                                                                                                                                                                                                                                  | NR                                                                                                              | Women<br>VC = 0.18<br>(p< 0.001)<br>Men                                                                                             | - Greater deprivation was associated with<br>poorer SRH.<br>- Cross-level interaction: Effect of<br>deprivation on SRH was greater among                                                                                                |

|                                                             |                         |                                        |                                                   |                                                                                                                                       |                                                                      |                                                                                                                                               |                                                                                                                                           |                                                           |                                                                                                                                                                                                                                                                                                      |
|-------------------------------------------------------------|-------------------------|----------------------------------------|---------------------------------------------------|---------------------------------------------------------------------------------------------------------------------------------------|----------------------------------------------------------------------|-----------------------------------------------------------------------------------------------------------------------------------------------|-------------------------------------------------------------------------------------------------------------------------------------------|-----------------------------------------------------------|------------------------------------------------------------------------------------------------------------------------------------------------------------------------------------------------------------------------------------------------------------------------------------------------------|
|                                                             |                         | 1991-1999                              |                                                   | Household type, Social housing, Access to car, Lag effect of antecedent SRH.                                                          |                                                                      |                                                                                                                                               |                                                                                                                                           | VC = 0.15 (p< 0.001) (Adjusted also for area deprivation) | women residing in social housing.                                                                                                                                                                                                                                                                    |
|                                                             |                         |                                        |                                                   | Sex-specific analyses                                                                                                                 |                                                                      |                                                                                                                                               |                                                                                                                                           |                                                           |                                                                                                                                                                                                                                                                                                      |
| <b>Pampalon (1999)</b> <sup>63</sup><br>/Canada             | Self-rated health (0/1) | Cross-Sectional/<br>1992/93            | 20739<br>48% Men<br>≥ 15y<br><br>11439 households | A, S, E, I, ES, MS, Smoking, PA, Alcohol consumption                                                                                  | 1833 Census enumeration areas<br>37 Regional subdivisions            | None                                                                                                                                          | NR                                                                                                                                        | VC (Se) Enumeration areas = 0.066 (0.030) Regions: NS     | - Examined between area variation only.                                                                                                                                                                                                                                                              |
| <b>Patel (2003)</b> <sup>64</sup><br>/USA                   | Self-rated health (ord) | Cross-sectional/<br>1993/94            | 2561<br>Mexican American<br>% Men NR<br>≥ 65y     | A, S, E, I, MS, SN, Stressful life events, Obesity, Smoking, Medical conditions, Disability, Language acculturation, Financial strain | 210 Census tracts                                                    | Economic disadvantage index <sup>d</sup> ,<br>% Mexican Americans <sup>d</sup> ,<br>Residence in a border USA/Mexico community <sup>i</sup> . | ICC = 0.161<br>SNR                                                                                                                        | NR                                                        | - Higher economic disadvantage, lower % of Mexican Americans, and border community location were associated with poorer SRH.<br>- Area-level interaction: Effect of area economic disadvantage on SRH was stronger among residents of border communities than among those of non-border communities. |
| <b>Reijneveld (2000)</b> <sup>65</sup><br>/The Netherlands  | Self-rated health (0/1) | Cross-Sectional/<br>Year NR            | 5121<br>% Men NR<br>≥ 16 y                        | A, S, I, E, ES                                                                                                                        | 92 City-defined neighbourhoods<br>76 Postcode sectors<br>22 Boroughs | Mean income <sup>d</sup> ,<br>% Benefit-dependent earners <sup>d</sup> ,<br>% Low-income earners <sup>d</sup> .                               | VC (Se) =<br>N'hoods:<br>0.074<br>(0.027)<br>Postcode sectors:<br>0.068<br>(0.025)<br>Boroughs:<br>0.053<br>(0.024)<br>(Age-sex adjusted) | NS                                                        | - For all three exposures, greater deprivation was associated with poorer SRH but only at the borough-level.                                                                                                                                                                                         |
| <b>*Reijneveld (2002)</b> <sup>39</sup><br>/The Netherlands | Self-rated health (0/1) | Cross-sectional/<br>Pooled survey data | 23269<br>% Men NR<br>≥ 16y                        | A, S, E                                                                                                                               | 484 City-defined neighbourhoods<br>7 Cities                          | General practitioner (GP) deprivation score <sup>d</sup> ,<br>Mean income <sup>d</sup> ,<br>% Benefit-dependent                               | NR                                                                                                                                        | VC (Se) - Area (n'hood) GP deprivation                    | - For all three exposures, greater deprivation was associated with poorer SRH at the neighbourhood level.<br>- Area effects on SRH were not                                                                                                                                                          |

|                                                 |                         |                               |                           |                                                                                                                                                    |                              |                                                                                           |                                                                                                                                             |                                                                                                                          |                                                                                                                                                                     |
|-------------------------------------------------|-------------------------|-------------------------------|---------------------------|----------------------------------------------------------------------------------------------------------------------------------------------------|------------------------------|-------------------------------------------------------------------------------------------|---------------------------------------------------------------------------------------------------------------------------------------------|--------------------------------------------------------------------------------------------------------------------------|---------------------------------------------------------------------------------------------------------------------------------------------------------------------|
|                                                 |                         | 1991-2000                     |                           |                                                                                                                                                    |                              | earners <sup>d</sup>                                                                      |                                                                                                                                             | score: 0.083<br>(0.034)<br>Area mean<br>income:<br>0.077<br>(0.034)<br>Areas %<br>social<br>benefit:<br>0.076<br>(0.034) | consistent across cities.                                                                                                                                           |
| <b>Robert (2002)</b> <sup>66</sup><br>/USA      | Self-rated health (NR)  | Cross-sectional/<br>1986      | 1669<br>41% Men<br>≥ 60y  | A, S, E, I, R/E,<br>Assets                                                                                                                         | 48 States                    | Socio-economic disadvantage index <sup>d</sup>                                            | VC (Se) =<br>0.10 (0.025)<br>ICC = 0.14                                                                                                     | VC (Se) =<br>0.04 (0.018)                                                                                                | - Greater socio-economic disadvantage was associated with poorer SRH.                                                                                               |
| <b>Stafford (2001)</b> <sup>67</sup><br>/UK     | Self-rated health (ord) | Cross-sectional/<br>1991-1993 | 6901<br>69% Men<br>35-55y | A, S,<br>Employment grade, SN,<br>Household deprivation,<br>Perceived housing quality,<br>Problems with n'hood,<br>Community participation         | 1831 Wards                   | Townsend Deprivation Index <sup>d</sup>                                                   | Women<br>VC (Se) =<br>0.18 (0.08)<br>Men<br>VC (Se) =<br>0.30 (0.08)<br><br>Women PP (PVR)=<br>34% (18-54%)<br>Men PP (PVR)=<br>20% (8-43%) | Women : NS<br>VC (Se) =<br>0.20 (0.07)                                                                                   | - Greater deprivation was associated with poorer SRH.<br>- Cross-level interaction: Effect of deprivation on SRH was greater among those in lower employment grade. |
| <b>*Stafford (2003)</b> <sup>40</sup><br>/UK    | Self-rated health (0/1) | Cross-sectional/<br>1997-1999 | 5539<br>70% Men<br>Age NR | A, S,<br>Employment grade,<br>Problems with n'hood<br>Financial problems,<br>Dissatisfaction with standard of living,<br>Position on social ladder | 2112 Wards                   | Townsend Deprivation Index <sup>d</sup>                                                   | NR                                                                                                                                          | NR                                                                                                                       | - Greater deprivation was associated with poorer SRH.                                                                                                               |
| <b>Stafford (2004)</b> <sup>68</sup><br>/UK and | Self-rated health (0/1) | Cross-sectional/<br>London:   | Pooled data;<br>London    | A, S, ES                                                                                                                                           | England: 863<br>Census wards | Unemployment rate <sup>d</sup> ,<br>% Single households <sup>d</sup> ,<br>% Single parent | VC (Se)<br>London:<br>0.106                                                                                                                 | London:<br>NS<br>Helsinki:                                                                                               | - In pooled data, higher % of unemployment, % of manual workers, and % single households were                                                                       |

|                                                     |                            |                                                                                        |                                                                     |                                                                                       |                                                |                                                                                                                                                                                                                                                                                                                                                                                                                                                                                                                                                                                                                                                                                                                                                                                                                        |                                                                                                                                 |                                                                   |                                                                                                                                                                                                                                                                                                                                                                                                                                                                                           |
|-----------------------------------------------------|----------------------------|----------------------------------------------------------------------------------------|---------------------------------------------------------------------|---------------------------------------------------------------------------------------|------------------------------------------------|------------------------------------------------------------------------------------------------------------------------------------------------------------------------------------------------------------------------------------------------------------------------------------------------------------------------------------------------------------------------------------------------------------------------------------------------------------------------------------------------------------------------------------------------------------------------------------------------------------------------------------------------------------------------------------------------------------------------------------------------------------------------------------------------------------------------|---------------------------------------------------------------------------------------------------------------------------------|-------------------------------------------------------------------|-------------------------------------------------------------------------------------------------------------------------------------------------------------------------------------------------------------------------------------------------------------------------------------------------------------------------------------------------------------------------------------------------------------------------------------------------------------------------------------------|
| Finland                                             |                            | 1991-1993;<br>Helsinki:<br>2000-2001                                                   | 5301<br>61% Men<br>35-55y;<br>Helsinki<br>4287<br>21% Men<br>40-60y |                                                                                       | Finland: 223<br>City-defined<br>neighbourhoods | households <sup>d</sup> ,<br>% Manual workers <sup>d</sup> .                                                                                                                                                                                                                                                                                                                                                                                                                                                                                                                                                                                                                                                                                                                                                           | (0.040)/<br>ICC = 0.03<br>Helsinki:<br>NS<br>(Age-sex<br>adjusted)                                                              | NS                                                                | associated with poorer SRH.<br>- Higher % of single parent households<br>was associated with poorer SRH in<br>London but not in Helsinki.                                                                                                                                                                                                                                                                                                                                                 |
| <b>Stafford<br/>(2005)</b> <sup>69</sup><br>/UK     | Self-rated<br>health (0/1) | Cross-<br>sectional/<br>Pooled data<br>from two<br>surveys<br>1994-1999;<br>1995/1998. | 8437<br>45% Men<br>≥ 16y                                            | A, SC, ES,<br>family type<br><br>Sex-specific<br>analyses                             | 238 Postal<br>sectors                          | Individual perceptions of:<br>family ties <sup>d</sup> ,<br>friendship ties <sup>d</sup> ,<br>participation <sup>d</sup> ,<br>integration into the wider<br>community <sup>d</sup> ,<br>trust <sup>d</sup> ,<br>attachment to n'hood <sup>d</sup> ,<br>tolerance <sup>d</sup> ,<br>being able to rely on<br>others <sup>d</sup><br><br>Score of n'hood<br>Political engagement <sup>i</sup> ,<br>Political climate <sup>i</sup> ,<br>Crime <sup>i</sup> ,<br>Access to multiple owned<br>food shops <sup>i</sup> ,<br>Access to banks and<br>building societies <sup>i</sup> ,<br>Health services <sup>i</sup> ,<br>Public recreation <sup>i</sup> ,<br>Quality of physical<br>environment <sup>i</sup> ,<br>Transport wealth <sup>i</sup> ,<br>Access private transport <sup>i</sup> ,<br>Unemployment <sup>d</sup> . | VC (Se)/<br>% variation<br>between<br>area:<br>Women:<br>0.212<br>(0.048)/ 6%<br>Men: 0.141<br>(0.045)/ 4%<br>(Age<br>adjusted) | VC (Se)<br>Women:<br>0.125<br>(0.039)<br>Men:<br>0.005<br>(0.033) | - Women: Lower levels of integration<br>into wider community, trust, tolerance,<br>political engagement, access to banks<br>and building societies, and access to<br>private transport, fewer health services,<br>poorer quality of environment, higher<br>unemployment, stronger family ties and<br>more left-wing political climate were<br>associated with poorer SRH.<br>- Men: Higher levels of crime and lower<br>access to multiple food shops were<br>associated with poorer SRH. |
| <b>Subramanian<br/>(2001)</b> <sup>70</sup><br>/USA | Self-rated<br>health (0/1) | Cross<br>Sectional/<br>1993/94                                                         | 144692<br>43% Men<br>18-98y                                         | A, S, R/E, I,<br>MS, Smoking,<br>Health check-<br>up, Health<br>insurance<br>coverage | 39 States                                      | Median income per<br>capita <sup>d</sup><br>Income inequality/Gini<br>coefficient <sup>i</sup> ,<br>Social capital <sup>d</sup> .                                                                                                                                                                                                                                                                                                                                                                                                                                                                                                                                                                                                                                                                                      | VC (Se) =<br>0.083<br>(0.020)                                                                                                   | VC (Se) =<br>0.039<br>(0.010)                                     | - Greater median income and social<br>capital level were associated with better<br>SRH.<br>- Cross-level interaction: Greater income<br>inequality was associated with better<br>SRH among high income group only.                                                                                                                                                                                                                                                                        |
| <b>Subramanian<br/>(2002)</b> <sup>71</sup><br>/USA | Self-rated<br>health (0/1) | Cross-<br>sectional/<br>2000                                                           | 21456<br>42% Men<br>18-89y                                          | A, S, R/E, E, I,<br>MS, Perceived<br>individual trust                                 | 34 Communities                                 | (d) Social trust (social<br>capital) <sup>d</sup>                                                                                                                                                                                                                                                                                                                                                                                                                                                                                                                                                                                                                                                                                                                                                                      | VC (Se) =<br>0.045<br>(0.015)                                                                                                   | NS                                                                | - Greater level of social trust was<br>associated with better SRH.<br>- When adjusting for individual perceived                                                                                                                                                                                                                                                                                                                                                                           |



|                                                 |                         |                                |                             |                                                                                                           |                        |                                                                                                                                                                                                                                                                                         |                                                                             |                                                                                                                                                                         |                                                                                                                                                                                                                                                                                       |
|-------------------------------------------------|-------------------------|--------------------------------|-----------------------------|-----------------------------------------------------------------------------------------------------------|------------------------|-----------------------------------------------------------------------------------------------------------------------------------------------------------------------------------------------------------------------------------------------------------------------------------------|-----------------------------------------------------------------------------|-------------------------------------------------------------------------------------------------------------------------------------------------------------------------|---------------------------------------------------------------------------------------------------------------------------------------------------------------------------------------------------------------------------------------------------------------------------------------|
|                                                 |                         |                                |                             |                                                                                                           |                        |                                                                                                                                                                                                                                                                                         |                                                                             |                                                                                                                                                                         | trust, main effect of social capital no longer significant                                                                                                                                                                                                                            |
|                                                 |                         |                                |                             |                                                                                                           |                        |                                                                                                                                                                                                                                                                                         |                                                                             |                                                                                                                                                                         | - Cross-level interaction: Protective effect of community social capital among high-trust individuals; among low-trust individuals, the effect was reversed.                                                                                                                          |
| <b>Subramanian (2003)</b> <sup>72</sup><br>/USA | Self-rated health (0/1) | Cross-sectional/<br>1995; 1997 | 201221<br>47% Men<br>≥ 18y  | A, S, R/E, MS,<br>E, I, ES,<br>Health insurance coverage                                                  | 50 States              | Income inequality/Gini coefficient <sup>i</sup> ,<br>% Black residents <sup>d</sup> .                                                                                                                                                                                                   | VC (Se) =<br>0.031<br>(0.007)<br>(Also adjusted for area income inequality) | VC (Se) =<br>0.029<br>(0.007)<br>(Also adjusted for area income inequality)                                                                                             | - Greater income inequality associated with poorer SRH.                                                                                                                                                                                                                               |
| <b>Subramanian (2005)</b> <sup>73</sup><br>/USA | Self-rated health (0/1) | Cross-sectional/<br>2000       | 21572<br>42% Men<br>18-89 y | A, S, R/E, MS,<br>E, I                                                                                    | 36 Communities         | None                                                                                                                                                                                                                                                                                    | VC (Se) =<br>0.045<br>(0.014)                                               | NS                                                                                                                                                                      | - Examined between area variation only.                                                                                                                                                                                                                                               |
| <b>Subramanian (2005)</b> <sup>74</sup><br>/USA | Self-rated health (0/1) | Cross-sectional/<br>2000       | 51316<br>47% Men<br>≥ 18y   | A, S, R/E, MS,<br>E, I                                                                                    | 207 Metropolitan areas | Black/white dissimilarity index <sup>d</sup> ,<br>Black isolation index <sup>d</sup> ,<br>White isolation index <sup>d</sup> ,<br>Total population size <sup>d</sup> ,<br>% Poor <sup>d</sup> .                                                                                         | NR                                                                          | VC (Se) =<br>0.037<br>(0.008)<br><br>White/Black disparity in reporting poorer SRH 0.172 (0.48) such that:<br>Whites<br>0.060<br>(0.012)<br>Blacks:<br>0.090<br>(Se NR) | - Covariation between the metropolitan area variation in SRH for Whites and the White/Black disparity in poorer SRH: Greater White/ Black disparity was associated with better SRH among Whites.<br>- Greater Black isolation index was associated with poorer SRH among Blacks only. |
| <b>Veenstra (2005)</b> <sup>75</sup><br>/Canada | Self-rated health (0/1) | Cross-sectional/<br>2002       | 1435<br>53% Men<br>≥ 18y    | A, S, E, I,<br>Trust in community members,<br>Political trust,<br>Participation in voluntary associations | 25 Communities         | Number public spaces per capita <sup>i</sup> ,<br>Number of voluntary organisations per capita <sup>i</sup> ,<br>Community and political trust <sup>d</sup> ,<br>Median household income <sup>d</sup> ,<br>Income inequality/ % of income held by poorest 50% households <sup>i</sup> . | NS                                                                          | NR                                                                                                                                                                      | - No significant area effects.                                                                                                                                                                                                                                                        |
| <b>Wen (2003)</b> <sup>76</sup>                 | Self-rated              | Cross-                         | 3459                        | A, S, R/E, E, I,                                                                                          | 343                    | Affluence <sup>d</sup> ,                                                                                                                                                                                                                                                                | NR                                                                          | NR                                                                                                                                                                      | - Higher affluence and education levels                                                                                                                                                                                                                                               |

|                                          |                            |                                   |                           |                                        |                           |                                                                                                                                                        |                              |                              |                                                                                                                                                              |
|------------------------------------------|----------------------------|-----------------------------------|---------------------------|----------------------------------------|---------------------------|--------------------------------------------------------------------------------------------------------------------------------------------------------|------------------------------|------------------------------|--------------------------------------------------------------------------------------------------------------------------------------------------------------|
| /USA                                     | health (ord)               | sectional/<br>1996; 1997;<br>1999 | 40% Men<br>≥ 18y          | MS, Smoking,<br>High blood<br>pressure | Neighbourhood<br>clusters | Education level <sup>d</sup> ,<br>Poverty <sup>d</sup> ,<br>Income inequality/Gini<br>coefficient <sup>i</sup> ,<br>Prior n'hood health <sup>d</sup> . |                              |                              | <p>were associated with better SRH.</p> <p>- Potential pathways linking affluence to SRH included crime, social resources, and the physical environment.</p> |
| <b>Xi (2005)<sup>77</sup></b><br>/Canada | Self-rated<br>health (0/1) | Cross-<br>sectional/<br>1996      | 30820<br>46% Men<br>≥ 25y | A, S, E, I, MS,<br>PA, Smoking         | Public Health<br>Units    | Median income <sup>d</sup> ,<br>Income inequality/Gini<br>coefficient <sup>i</sup> .                                                                   | VC (Se):<br>0.042<br>(0.012) | VC (Se):<br>0.020<br>(0.008) | - Lower median income and higher income inequality were associated with poorer SRH.                                                                          |

| CVD and risk factors                         |                                                                                  |                                                   |                                        |                                                            |                                              |                                                                                                                                                         |                                                                                                                                                 |                                           |                                                                                                                                                                                                                                                                  |
|----------------------------------------------|----------------------------------------------------------------------------------|---------------------------------------------------|----------------------------------------|------------------------------------------------------------|----------------------------------------------|---------------------------------------------------------------------------------------------------------------------------------------------------------|-------------------------------------------------------------------------------------------------------------------------------------------------|-------------------------------------------|------------------------------------------------------------------------------------------------------------------------------------------------------------------------------------------------------------------------------------------------------------------|
| Citation /location                           | Health Outcome /Analytic variable                                                | Design/year of data collection (individual level) | Individual sample size (sex/age range) | Individual characteristics adjusted for                    | Sample size of areas                         | Area-level exposures                                                                                                                                    | Crude between area variation                                                                                                                    | Adjusted between area variation           | Significant adjusted area effects                                                                                                                                                                                                                                |
| <b>Chaix (2003)</b> <sup>78</sup><br>/France | Overweight (0/1)<br>Smoking (0/1)<br>Drinking (0/1)<br>Physical inactivity (0/1) | Cross-sectional/<br>1999                          | 12948<br>49% Men<br>16-75y             | A, S, E, I, ES,<br>MS, OS                                  | 95<br>Administrative departments             | Gross domestic product (GDP) per capita <sup>d</sup> ,<br>Type of county of residence (rural, small town, medium sized city, major city) <sup>i</sup> . | NR                                                                                                                                              | NR                                        | - Higher GDP was associated with greater odds of being a dependent smoker among both women and men, and with being a dependent drinker among women only.<br>- Cross-level interaction: Higher GDP was associated with overweight among blue-collar workers only. |
| <b>Chaix (2004)</b> <sup>79</sup><br>/France | Smoking (1/0; cont)                                                              | Cross-sectional/<br>1999                          | 12948<br>49% Men<br>16-75y             | A, S, E, I, ES,<br>MS, OS                                  | 95<br>Administrative departments             | Gross domestic product (GDP) per capita <sup>d</sup> ,<br>Type of county of residence (rural, small town, medium sized city, major city) <sup>i</sup> . | NR                                                                                                                                              | Smoking (0/1):<br>VC (Se) = 0.014 (0.007) | - Higher GDP was associated with greater odds of smoking.<br>- Among smokers, higher GDP was associated with greater levels of tobacco consumption.                                                                                                              |
| <b>Chang (2005)</b> <sup>80</sup><br>/USA    | BMI (cont)                                                                       | Cross-sectional/<br>1996-1998                     | 143931<br>44% Men<br>≥ 18y             | A, E, I<br>Census region<br><br>Sex-race specific analyses | 226<br>Metropolitan statistical areas (MSAs) | Income inequality/Gini coefficient <sup>i</sup> ,<br>Median household income <sup>d</sup> ,<br>Population size <sup>d</sup> .                           | VC =<br>White women:<br>0.320 (p<0.001);<br>White men:<br>0.174 (p<0.001);<br>Black women:<br>0.780 (p<0.001);<br>Black men:<br>0.473 (p<0.001) | NR                                        | - Greater income inequality was associated with lower BMI among White women only.<br>- Greater median income was associated with lower BMI among White women and men only.                                                                                       |
| <b>Chuang (2005)</b> <sup>81</sup><br>/USA   | Smoking (cont)                                                                   | Cross-sectional/<br>Pooled data from five surveys | 8121<br>45% Men<br>25-74y              | A, S, E, I, R/E                                            | 82 Census tracts and/or Census blocks        | SES score <sup>d</sup> ,<br>Within a one-mile radius around individual residence:<br>Density of convenience                                             | NR                                                                                                                                              | NR                                        | - Lower SES, higher convenience store density, and lower distance to convenience store were associated with greater odds of smoking, but in separate models only.                                                                                                |

|                                               |                                                                                                                                                                                                                 |                                                                |                            |                                                           |                                       |                                                                                                                             |    |                                                                                      |                                                                                                                                                                                                                                                                                                                                                                                                                                                                                                                                                                                                      |
|-----------------------------------------------|-----------------------------------------------------------------------------------------------------------------------------------------------------------------------------------------------------------------|----------------------------------------------------------------|----------------------------|-----------------------------------------------------------|---------------------------------------|-----------------------------------------------------------------------------------------------------------------------------|----|--------------------------------------------------------------------------------------|------------------------------------------------------------------------------------------------------------------------------------------------------------------------------------------------------------------------------------------------------------------------------------------------------------------------------------------------------------------------------------------------------------------------------------------------------------------------------------------------------------------------------------------------------------------------------------------------------|
|                                               |                                                                                                                                                                                                                 | 1979-1990                                                      |                            |                                                           |                                       | stores <sup>1</sup> ,<br>Distance of convenience<br>stores <sup>1</sup> ,<br>Number of convenience<br>stores <sup>1</sup> . |    |                                                                                      | <ul style="list-style-type: none"> <li>- Cross-level interaction: In more affluent areas only, high-SES individuals were less likely to smoke.</li> <li>- Area-level interaction: In areas with higher convenience store density, the odds of smoking were similar across all income groups.</li> </ul>                                                                                                                                                                                                                                                                                              |
| <b>Cubbin (2005)</b> <sup>82</sup><br>/USA    | Behaviour change (0/1)<br>12-year probability experiencing CHD event (cont)                                                                                                                                     | Cross-sectional/<br>Pooled data from five surveys<br>1979-1990 | 8197<br>45% Men<br>12-74y  | A, S, R/E, MS, SES, City, Survey year                     | 82 Census tracts and/or Census blocks | Townsend Index of deprivation <sup>d</sup> .                                                                                | NR | Significant, but no variance estimates reported (Also adjusted for area deprivation) | <ul style="list-style-type: none"> <li>- Higher deprivation was associated with greater odds of no positive behaviour changes.</li> </ul>                                                                                                                                                                                                                                                                                                                                                                                                                                                            |
| <b>Diez-Roux (1999)</b> <sup>83</sup><br>/USA | Dietary intake (cont):<br>fruits, vegetables, meat, fish.<br>Unhealthy dietary intake (0/1):<br>fruits, vegetables, meat, fish.<br>Nutrients intake (cont):<br>saturated fat, polyunsaturated fat, cholesterol. | Cross-sectional/<br>1987; 1989                                 | 13095<br>45% Men<br>45-64y | I, Residential location<br><br>Sex-race specific analysis | Census block groups                   | Median household income <sup>d</sup>                                                                                        | NR | NS                                                                                   | <ul style="list-style-type: none"> <li>- White men: Lower income was associated with lower intake of fruits and fish, and with greater odds of unhealthy dietary intake of fruits.</li> <li>- Black men: Lower income was associated with greater intake of cholesterol and polyunsaturated fat.</li> <li>- White women: Lower income was associated with lower intake of fruits and fish, greater intake of meat, and greater odds of unhealthy dietary intake of fish and meat.</li> <li>- Black women: Lower income was associated greater odds of unhealthy dietary intake of fruits.</li> </ul> |
| <b>Diez-Roux (2000)</b> <sup>84</sup><br>/USA | Sedentarism (0/1)<br>Smoking (0/1)<br>BMI (cont)<br>HBP (0/1)                                                                                                                                                   | Cross-sectional/<br>1990                                       | 70534<br>43% Men<br>≥ 18y  | I, R/E<br><br>Sex-income specific analyses                | 44 States                             | Income inequality/Robin Hood Index <sup>1</sup>                                                                             | NR | NR                                                                                   | <ul style="list-style-type: none"> <li>- Among lower income women, greater inequality was associated with higher BMI and greater odds of HBP.</li> <li>- Among higher income women, greater inequality associated with greater odds of smoking.</li> <li>- Among both men and women and across categories of individual-level income, greater inequality associated</li> </ul>                                                                                                                                                                                                                       |

|                                            |                                                                                                                                               |                                                     |                                     |                                                                                            |                                             |                                                                                                                                                                                                                                                          |                                                                                                                        |                                                                |                                                                                                                                                                                                                                                                                                                           |
|--------------------------------------------|-----------------------------------------------------------------------------------------------------------------------------------------------|-----------------------------------------------------|-------------------------------------|--------------------------------------------------------------------------------------------|---------------------------------------------|----------------------------------------------------------------------------------------------------------------------------------------------------------------------------------------------------------------------------------------------------------|------------------------------------------------------------------------------------------------------------------------|----------------------------------------------------------------|---------------------------------------------------------------------------------------------------------------------------------------------------------------------------------------------------------------------------------------------------------------------------------------------------------------------------|
|                                            |                                                                                                                                               |                                                     |                                     |                                                                                            |                                             |                                                                                                                                                                                                                                                          |                                                                                                                        |                                                                | with greater likelihood of sedentary behaviour.                                                                                                                                                                                                                                                                           |
| <b>Duncan (1999)</b> <sup>85</sup><br>/UK  | Smoking (0/1)                                                                                                                                 | Cross-sectional/<br>1984/85                         | 9003<br>% Men NR<br>Age NR          | A, S, E, SC,<br>ES, MS,<br>Housing tenure                                                  | 396 Electoral<br>wards<br>198 Regions       | Ward-level composite<br>index of deprivation <sup>d</sup>                                                                                                                                                                                                | NR                                                                                                                     | VC (Se) =<br>Ward: 0.051<br>(0.02)<br>Region: NS               | - Greater deprivation was associated with greater odds of smoking.                                                                                                                                                                                                                                                        |
| <b>Ecob (2000)</b> <sup>86</sup><br>/UK    | Smoking (1/0; cont)<br>Alcohol consumption above safe limit (0/1)<br>Alcohol consumption levels (cont)<br>Diet (0/1)<br>Exercise (0/1)        | Cross-sectional/<br>1987/88                         | 15y:1009;<br>35y: 985;<br>55y:1042; | E, I, SC, MS,<br>Moved in the 5 years preceding interview<br><br>Sex-age specific analyses | Postcode sectors                            | Carstairs-Morris Index of deprivation <sup>d</sup>                                                                                                                                                                                                       | NR                                                                                                                     | All age/both sex<br>VC (Se) =<br>Unhealthy diet 0.17<br>(0.07) | - Greater deprivation was associated with unhealthy diet lack of exercise, and smoking.<br>- Cross-level interaction: Among lower income groups, deprivation was associated with unhealthy diet.<br>- Among those aged 35y or 55y, greater deprivation was associated with unhealthy diet, lack of exercise, and smoking. |
| <b>Ewing (2003)</b> <sup>87</sup><br>/USA  | Any PA (cont)<br>Meeting guidelines for PA (0/1)<br>Walking (cont)<br>Obesity (0/1)<br>BMI (cont)<br>HBP (0/1)<br>Diabetes (0/1)<br>CHD (0/1) | Cross-sectional/<br>Pooled survey data<br>1998-2000 | 206992<br>% Men NR<br>18-75y        | A, S, R/E, E,<br>Smoking,<br>Fruit/<br>vegetable consumption,                              | 83 Metropolitan areas (MAs)<br>448 Counties | Metropolitan sprawl index <sup>1</sup> ,<br>County sprawl index <sup>1</sup> .                                                                                                                                                                           | NR                                                                                                                     | NR                                                             | - Less sprawl at the county and MA levels were associated with higher levels of walking for leisure<br>- Less sprawl at the county level was associated with lower BMI and lower odds of obesity and HBP.                                                                                                                 |
| <b>Fisher (2004)</b> <sup>88</sup><br>/USA | Walking: Latent variable comprising three items (cont):<br>1: Walk/stroll in n'hood<br>2: Walk/any physical activity with                     | Cross-sectional/<br>2001                            | 582<br>31% Men<br>≥ 65y             | A, S, R/E, MS,<br>E, I, Health status, Walking efficacy                                    | 56 City-defined neighbourhoods              | Social cohesion <sup>d</sup> ,<br>N'hood problems <sup>d</sup> ,<br>Safety <sup>d</sup> ,<br>% Low income <sup>d</sup> ,<br>% White residents<br>Senior population <sup>d</sup> ,<br>density <sup>d</sup> ,<br>Facilities per n'hood acre <sup>i</sup> . | ICC for the three items of walking - SNR:<br>Item 1:<br>ICC = 0.04<br>Item 2:<br>ICC = 0.03,<br>Item 3:<br>ICC = 0.02. | NR                                                             | - Higher social cohesion, % of low-income households, % of senior residents, number of facilities for walking, and % of White residents, were associated with greater levels of walking.                                                                                                                                  |

|                                                    |                                                                                                                    |                                 |                           |                                                                                                                                                             |                                   |                                                                                                                                                                                                                                                                                  |                                                                                                                                                                                                            |                                                                                                                                                       |                                                                                                                                                                                                                                                                                                                                                                                                    |
|----------------------------------------------------|--------------------------------------------------------------------------------------------------------------------|---------------------------------|---------------------------|-------------------------------------------------------------------------------------------------------------------------------------------------------------|-----------------------------------|----------------------------------------------------------------------------------------------------------------------------------------------------------------------------------------------------------------------------------------------------------------------------------|------------------------------------------------------------------------------------------------------------------------------------------------------------------------------------------------------------|-------------------------------------------------------------------------------------------------------------------------------------------------------|----------------------------------------------------------------------------------------------------------------------------------------------------------------------------------------------------------------------------------------------------------------------------------------------------------------------------------------------------------------------------------------------------|
|                                                    | neighbours<br>3: Walk/any<br>physical<br>activity in<br>n'hood park                                                |                                 |                           |                                                                                                                                                             |                                   |                                                                                                                                                                                                                                                                                  |                                                                                                                                                                                                            |                                                                                                                                                       |                                                                                                                                                                                                                                                                                                                                                                                                    |
| <b>Kairouz (2005)</b> <sup>89</sup><br>/Canada     | Drinking<br>(1/0; cont),<br>Alcohol<br>Dependence<br>(0/1)                                                         | Cross-<br>sectional/<br>Year NR | 4918<br>% Men NR<br>≥ 15y | A, S, MS, E, I                                                                                                                                              | 373 Census<br>subdivisions        | None                                                                                                                                                                                                                                                                             | NS                                                                                                                                                                                                         | NS                                                                                                                                                    | - Examined between area variation only.                                                                                                                                                                                                                                                                                                                                                            |
| <b>Kavanagh (2005)</b> <sup>90</sup><br>/Australia | Any<br>physical<br>activity (0/1)<br>Walking<br>(0/1)<br>Cycling<br>(0/1)<br>Jogging<br>(0/1)<br>Swimming<br>(0/1) | Cross-<br>sectional/<br>Year NR | 2349<br>44% Men<br>18-74y | A, S, E, I, OS                                                                                                                                              | 50 Collectors<br>districts        | % Low-income <sup>d</sup>                                                                                                                                                                                                                                                        | VC (Se) =<br>Overall PA :<br>0.127<br>(0.043)<br>Walking :<br>0.242<br>(0.079)<br>Cycling :<br>0.226<br>(0.073)<br>Jogging:<br>0.159<br>(0.058)<br>Swimming :<br>0.142<br>(0.061)<br>(Age-sex<br>adjusted) | VC (Se) =<br>Overall PA :<br>NS<br>Walking :<br>0.209<br>(0.071)<br>Cycling :<br>0.201<br>(0.067)<br>Jogging:<br>NS<br>Swimming :<br>0.127<br>(0.058) | - Higher % low-income was associated<br>with lower levels of any physical<br>activity and jogging.                                                                                                                                                                                                                                                                                                 |
| <b>Leyland (2005)</b> <sup>91</sup><br>/UK         | Presence of<br>one or more<br>CVD<br>conditions<br>(0/1)                                                           | Cross-<br>sectional/<br>1998/99 | 8804<br>43% Men<br>18-74y | A, S, SC,<br>Smoking                                                                                                                                        | 312 Postcode<br>sectors           | Carstairs Index of<br>deprivation <sup>d</sup> ,<br>Social class <sup>d</sup> ,<br>Smokers <sup>d</sup> .                                                                                                                                                                        | ICC = 0.011<br>SNR<br>(Age-sex<br>adjusted)                                                                                                                                                                | ICC = 0.010<br>SNR                                                                                                                                    | - Greater deprivation was associated with<br>greater odds of having one or more<br>CVD conditions.                                                                                                                                                                                                                                                                                                 |
| <b>Li (2005)</b> <sup>92</sup><br>/USA             | Walking<br>(cont)                                                                                                  | Cross-<br>sectional/<br>2001    | 577<br>36% Men<br>65-94y  | A, S, E, I, R/E,<br>MS,<br>Perceptions of:<br>Proximity to<br>recreational<br>facilities,<br>Safety for<br>walking,<br>Safety from<br>traffic,<br>Number of | 56 City-defined<br>neighbourhoods | Density of places of<br>employment <sup>i</sup> ,<br>Density of households <sup>i</sup> ,<br>Number of street<br>intersections <sup>i</sup> ,<br>Total green and open<br>spaces for recreation <sup>i</sup> .<br><br>Within 0.5 mile radius<br>around the home:<br>Number street | ICC = 0.28<br>SNR                                                                                                                                                                                          | NR                                                                                                                                                    | - Greater density of places of<br>employment, density of household,<br>number of street intersections, and<br>number of green and open spaces were<br>associated with higher levels of<br>walking.<br>- More favourable perception of number<br>of recreational facilities and safety for<br>walking were associated with higher<br>levels of walking.<br>- Cross-level interaction: In areas with |

|                                                             |                                                                                                             |                                                     |                                                                              |                                                                                                     |                                             |                                                                                                                                                                                               |                                                                |                                                                              |                                                                                                                                                                                                                                                                                                                                                                                                                                                            |
|-------------------------------------------------------------|-------------------------------------------------------------------------------------------------------------|-----------------------------------------------------|------------------------------------------------------------------------------|-----------------------------------------------------------------------------------------------------|---------------------------------------------|-----------------------------------------------------------------------------------------------------------------------------------------------------------------------------------------------|----------------------------------------------------------------|------------------------------------------------------------------------------|------------------------------------------------------------------------------------------------------------------------------------------------------------------------------------------------------------------------------------------------------------------------------------------------------------------------------------------------------------------------------------------------------------------------------------------------------------|
|                                                             |                                                                                                             |                                                     |                                                                              | nearby recreational facilities                                                                      |                                             | intersections <sup>1</sup> ,<br>Total green areas <sup>1</sup> .                                                                                                                              |                                                                |                                                                              | greater street intersections, levels of walking were higher among those perceiving greater safety from traffic.                                                                                                                                                                                                                                                                                                                                            |
| <b>Lindström (2003)</b> <sup>93</sup><br>/Sweden            | Leisure-time physical activity (0/1)                                                                        | Cross-sectional/<br>1994                            | 3377<br>49% Men<br>20-80y                                                    | A, S, E,<br>Foreign born,<br>Social participation                                                   | 74 City-defined administrative areas        | Residential mobility (social capital) <sup>d</sup>                                                                                                                                            | VC (Se) = 0.171 (0.053)                                        | NS                                                                           | - No significant area effects.                                                                                                                                                                                                                                                                                                                                                                                                                             |
| <b>Lindström (2003)</b> <sup>94</sup><br>/Sweden            | Smoking (0/1)                                                                                               | Cross-sectional/<br>1994                            | 3393<br>49% Men<br>20-80y                                                    | A, S, E,<br>Foreign born,<br>Social participation                                                   | 77 City-defined administrative areas        | None                                                                                                                                                                                          | VC (Se) = 0.085 (0.034)<br>ICC = 0.025                         | NS                                                                           | - Examined between area variation only.                                                                                                                                                                                                                                                                                                                                                                                                                    |
| <b>Morland (2002)</b> <sup>95</sup><br>/USA                 | Meeting dietary guidelines in (0/1):<br>Fruits & Vegetables;<br>Cholesterol;<br>Total fat;<br>Saturated fat | Cross-sectional/<br>1993-1995                       | 2392 Black Americans<br>36% Men<br>8231 White Americans<br>46% Men<br>35-74y | S, E, I<br>Race/ethnicity specific analyses                                                         | 208 Census tracts                           | Number of supermarkets <sup>1</sup> ,<br>Number of small grocery stores <sup>1</sup> ,<br>Number of full service restaurants <sup>1</sup> ,<br>Number of fast-food restaurants <sup>1</sup> . | NR                                                             | NR                                                                           | - Black Americans: Greater number of supermarkets was associated with greater odds of meeting dietary guidelines for fruits and vegetable intake, total and saturated fat; greater number of full-service restaurants was associated with greater odds of meeting dietary guidelines for saturated fat.<br>- White Americans: Greater number of supermarkets was associated with greater odds of meeting dietary requirements for total and saturated fat. |
| <b>Morris (2001)</b> <sup>96</sup><br>/UK                   | CHD incidence (0/1)                                                                                         | Follow-up/<br>1978-1980;<br>1996                    | 7735<br>Men only<br>40-59y                                                   | A, SC, Blood pressure, BMI, Serum total cholesterol, PA, Smoking, Alcohol consumption               | 24 Towns                                    | Water hardness <sup>1</sup> ,<br>Max temperature <sup>1</sup> ,<br>Min temperature <sup>1</sup> ,<br>Daily rainfall <sup>1</sup> ,<br>Sunshine hours <sup>1</sup> .                           | VC = 0.028<br>SNR<br>(Age adjusted)                            | VC = 0.014<br>SNR                                                            | - No significant area effects.                                                                                                                                                                                                                                                                                                                                                                                                                             |
| <b>*Reijneveld (2002)</b> <sup>39</sup><br>/The Netherlands | Smoking (0/1)                                                                                               | Cross-sectional/<br>Pooled survey data<br>1991-2000 | 23269<br>% Men NR<br>≥ 16y                                                   | A, S, E                                                                                             | 484 City-defined neighbourhoods<br>7 cities | General practitioner (GP) deprivation score <sup>d</sup> ,<br>Mean income <sup>d</sup> ,<br>% Benefit-dependent earners <sup>d</sup> .                                                        | NR                                                             | NS                                                                           | - For all exposures, greater deprivation was associated with greater likelihood of smoking.<br>- Area effects on smoking were not consistent across cities.                                                                                                                                                                                                                                                                                                |
| <b>Robert (2004)</b> <sup>97</sup><br>/USA                  | BMI (cont)                                                                                                  | Cross-sectional/<br>1986                            | 3617<br>38% Men<br>≥ 25y                                                     | A, R/E, MS, E, I, ES, Assets, SN, PA, Smoking, Financial chronic stress, Number of stressful events | 48 States                                   | Socio-economic disadvantage index <sup>d</sup> ,<br>Income inequality/Gini coefficient <sup>1</sup> ,<br>% Black <sup>d</sup> .                                                               | Women:<br>ICC = 0.06 (p<0.001)<br>Men:<br>ICC = 0.11 (p<0.001) | VC (Se) =<br>Women:<br>1.05 (0.33) (p<0.01)<br>Men:<br>1.74 (0.48) (p<0.001) | - Higher socio-economic disadvantage and income inequality were associated with higher BMI among women only.                                                                                                                                                                                                                                                                                                                                               |

| Sex-specific analyses                             |                                                           |                               |                                                                   |                                                                                                                                                  |                                   |                                                                                                     |                                                          |                                                                                                    |                                                                                                                                             |
|---------------------------------------------------|-----------------------------------------------------------|-------------------------------|-------------------------------------------------------------------|--------------------------------------------------------------------------------------------------------------------------------------------------|-----------------------------------|-----------------------------------------------------------------------------------------------------|----------------------------------------------------------|----------------------------------------------------------------------------------------------------|---------------------------------------------------------------------------------------------------------------------------------------------|
| <b>Scribner (2000)</b> <sup>98</sup><br>/USA      | Alcohol consumption (cont)                                | Cross-sectional/<br>Year NR   | 2604<br>% Men NR<br>> 18y                                         | A, S, R/E, E                                                                                                                                     | 24 Census tracts                  | Mean distance to the closest alcohol outlet <sup>i</sup>                                            | 11.5%<br>SNR                                             | NR                                                                                                 | - Greater mean distance to closest alcohol outlet was associated with lower alcohol consumption.                                            |
| <b>*Stafford (2003)</b> <sup>40</sup><br>/UK      | Wais to hip ratio (cont)                                  | Cross-sectional/<br>1997-1999 | 5539<br>70% Men<br>Age NR                                         | A, S,<br>Employment grade,<br>Problems with n'hood,<br>Financial problems,<br>Dissatisfaction with living standard,<br>Position on social ladder | 2 112 Wards                       | Townsend Deprivation Index <sup>d</sup>                                                             | NR                                                       | NR                                                                                                 | - Higher deprivation was associated with higher mean waist/hip ratio.                                                                       |
| <b>Stjärne (2004)</b> <sup>99</sup><br>/Sweden    | Myocardial infarction (MI) (rate)                         | Case-control/<br>1992-1994    | Case:<br>1546<br>69% Men<br>Control:<br>2064<br>66% Men<br>45-70y | A, E, OS,<br>Labour market position,<br>Cohabiting/non cohabiting, SN,<br>Smoking, BMI,<br>Hypertension,                                         | 862 Small residential areas       | Townsend Deprivation Index <sup>d</sup> ,<br>Congdon's Index of social fragmentation <sup>d</sup> . | Women:<br>VC = 0.146<br>SNR<br>Men:<br>VC = 0.065<br>SNR | NR                                                                                                 | - Greater deprivation and social fragmentation were associated with greater risk of MI; the effect was stronger among women than among men. |
| Sex-specific analyses                             |                                                           |                               |                                                                   |                                                                                                                                                  |                                   |                                                                                                     |                                                          |                                                                                                    |                                                                                                                                             |
| <b>Sundquist (1999)</b> <sup>100</sup><br>/Sweden | Obesity (0/1)<br>Smoking (0/1)<br>Physical activity (0/1) | Cross-sectional/<br>1988/89   | 9240<br>% Men NR<br>25-74y                                        | A, S, E                                                                                                                                          | 8519 Small-area market statistics | Care Need Deprivation Index <sup>d</sup> ,<br>Townsend Deprivation Index <sup>d</sup> .             | NR                                                       | NR                                                                                                 | - Greater deprivation (as measured by both indices) was associated with greater likelihood of smoking, physical inactivity, and obesity.    |
| <b>Sundquist (2004)</b> <sup>101</sup><br>/Sweden | Coronary heart disease (rate)                             | Follow-up/<br>1995-1999       | 2637628<br>50% Men<br>40-64y                                      | A, I<br><br>Sex-specific analyses                                                                                                                | 8547 Small-area market statistics | Care Need Deprivation Index <sup>d</sup>                                                            | NR                                                       | Women:<br>VC (Se) = 0.084 (0.009)<br>ICC = 0.025<br>Men:<br>VC (Se) = 0.034 (0.004)<br>ICC = 0.010 | - Greater deprivation was associated with higher risk of developing coronary heart disease.                                                 |
| <b>Sundquist</b>                                  | Coronary                                                  | Follow-up/                    | 25319                                                             | A, S, E, I,                                                                                                                                      | 6145 Small-area                   | % Less than 10y of                                                                                  | NR                                                       | VC (Se) =                                                                                          | - Lower education and income levels                                                                                                         |



|                                                                    |                                                                                                                  |                                                   |                                        |                                                                                          |                                        |                                                                                                                                                                                                                                                                                                     |    |                                                                          |                                                                                                                                                                                                                                                                                                                                                                                                                                                                                                                                                                                                     |
|--------------------------------------------------------------------|------------------------------------------------------------------------------------------------------------------|---------------------------------------------------|----------------------------------------|------------------------------------------------------------------------------------------|----------------------------------------|-----------------------------------------------------------------------------------------------------------------------------------------------------------------------------------------------------------------------------------------------------------------------------------------------------|----|--------------------------------------------------------------------------|-----------------------------------------------------------------------------------------------------------------------------------------------------------------------------------------------------------------------------------------------------------------------------------------------------------------------------------------------------------------------------------------------------------------------------------------------------------------------------------------------------------------------------------------------------------------------------------------------------|
| <b>(2004)</b> <sup>102</sup><br>/Sweden                            | heart disease<br>(rate)                                                                                          | 1986-1993;<br>1997                                | 49% Men<br>35-74y                      | Smoking,<br>Years of<br>n'hood<br>residency                                              | market statistics                      | education <sup>d</sup> ,<br>% Income in lowest<br>national quartile <sup>d</sup> .                                                                                                                                                                                                                  |    | 0.25 (0.10)<br>(Also<br>adjusted for<br>area income<br>and<br>education) | were associated with higher risk of<br>developing coronary heart disease.                                                                                                                                                                                                                                                                                                                                                                                                                                                                                                                           |
| <b>Tonne<br/>(2005)</b> <sup>103</sup><br>/USA                     | Survival<br>after acute<br>myocardial<br>infarction<br>(AMI) (cont)                                              | Cross-<br>sectional/<br>1995; 1997;<br>1999; 2001 | 3423<br>58% Men<br>≥ 25y               | A, S, R/E,<br>Medical<br>history;<br>Clinical<br>complications;<br>AMI order and<br>type | 111 Census<br>tracts                   | Median income <sup>d</sup> ,<br>% Below poverty line <sup>d</sup> ,<br>% Low education <sup>d</sup> ,<br>% Overcrowding <sup>d</sup> ,<br>Composite deprivation<br>score (four measures) <sup>d</sup> .                                                                                             | NR | NR                                                                       | - Greater levels of overcrowding, %<br>living below the poverty line, % low<br>education, greater deprivation, and<br>lower median income were associated<br>with lower survival after AMI.                                                                                                                                                                                                                                                                                                                                                                                                         |
| <b>Twigg<br/>(2000)</b> <sup>104</sup><br>/UK                      | Smoking<br>(0/1)<br>Alcohol<br>consumption<br>(0/1)                                                              | Cross-<br>sectional/<br>Year NR                   | Sample<br>size NR<br>% Men NR<br>≥ 16y | A, S, MS                                                                                 | Wards                                  | % Population with no<br>car <sup>d</sup> ,<br>% Population with dual<br>car ownership <sup>d</sup> ,<br>% Population privately<br>renting <sup>d</sup> ,<br>% Population higher<br>social class (I or IIa) <sup>d</sup> .                                                                           | NR | NR                                                                       | - Higher % of population with no car and<br>privately renting were associated with<br>greater odds of smoking, whereas<br>higher % of dual car ownership was<br>associated with lower odds of smoking.<br>- Higher % of population of higher social<br>class, privately renting, and dual car<br>ownership were associated with greater<br>odds of problem drinking.<br>- Cross-level interactions: Single women<br>living in areas of higher % of privately<br>rented households had higher odds of<br>problem drinking, and those living in<br>more affluent areas had higher odds of<br>smoking. |
| <b>Van Lenthe<br/>(2002)</b> <sup>105</sup><br>/The<br>Netherlands | Overweight<br>(0/1)                                                                                              | Cross-<br>sectional/<br>1991                      | 8897<br>49% Men<br>20-70y              | A, S, E                                                                                  | 86<br>Administrative<br>neighbourhoods | Index of neighbourhood<br>deprivation <sup>d</sup>                                                                                                                                                                                                                                                  | NR | NS                                                                       | - Greater deprivation was associated with<br>higher odds of overweight.<br>- Cross-level interactions: Higher<br>deprivation was associated with greater<br>odds of overweight among women, in<br>the ≥ 49 y group, and in all education<br>groups except highest.                                                                                                                                                                                                                                                                                                                                  |
| <b>van Lenthe<br/>(2005)</b> <sup>106</sup><br>/The<br>Netherlands | Walking/<br>cycling to<br>shops/work<br>(0/1);<br>Walking/<br>cycling/<br>gardening in<br>leisure time<br>(0/1); | Cross-<br>sectional/<br>1991                      | 8767<br>49% Men<br>20-70 y             | A, S, E                                                                                  | 78<br>Administrative<br>neighbourhoods | Index of neighbourhood<br>deprivation <sup>d</sup><br>General physical design of<br>neighbourhood <sup>i</sup> ,<br>Quality green facilities <sup>i</sup> ,<br>Noise pollution from<br>traffic <sup>i</sup> ,<br>Police attention required <sup>i</sup> ,<br>Availability food shops <sup>i</sup> , | NR | NR                                                                       | - Greater deprivation was associated with<br>lower odds of almost never<br>walking/cycling to shops or work, with<br>greater odds of almost never walking,<br>cycling or gardening in leisure time, and<br>with lower odds of sport participation.<br>- Poorer general physical design and<br>higher levels of noise pollution were<br>associated with greater odds of almost                                                                                                                                                                                                                       |

|                                                             |                                                             |                          |                             |         |                                                                |                                                                                                                                                                                              |                                                                                     |    |                                                                                                                                                                                                                                                                                                                                                                                                                                                                                                        |
|-------------------------------------------------------------|-------------------------------------------------------------|--------------------------|-----------------------------|---------|----------------------------------------------------------------|----------------------------------------------------------------------------------------------------------------------------------------------------------------------------------------------|-------------------------------------------------------------------------------------|----|--------------------------------------------------------------------------------------------------------------------------------------------------------------------------------------------------------------------------------------------------------------------------------------------------------------------------------------------------------------------------------------------------------------------------------------------------------------------------------------------------------|
|                                                             | Sport participation (0/1)                                   |                          |                             |         | Availability sports and recreational facilities <sup>1</sup> . |                                                                                                                                                                                              |                                                                                     |    | never walking/cycling and gardening during leisure time.<br>- Less proximity to sports facilities and lower levels of police attention were associated with lower participation in sport activities.<br>- Cross-level interactions: Odds of almost never walking/cycling to shops or work were lower in the 20-49 y group in areas with greater noise pollution; greater in the 50-70 y group in areas with less proximity to shops; and lower in the 50-70 y group in areas with greater deprivation. |
| <b>Wendel-Vos (2004)</b> <sup>107</sup><br>/The Netherlands | Walking/cycling for (cont): Recreation; Commuting; Overall. | Cross-sectional/<br>1998 | 11541<br>46% Men<br>20-59 y | A, S, E | 300m radius and 500m radius around postal code                 | Square area of green and recreational space:<br>Woods <sup>i</sup> ,<br>Parks <sup>i</sup> ,<br>Sport grounds <sup>i</sup> ,<br>Allotments <sup>i</sup> ,<br>Day-trip grounds <sup>1</sup> . | Between person variance 100 times greater than between postal code variance;<br>SNR | NR | - In areas defined by the 300m radius only, square area of sport ground was associated with more overall cycling, cycling for leisure and for commuting purposes; square area of parks was also significantly associated with more cycling for commuting.                                                                                                                                                                                                                                              |

| Mortality                                              |                                                                                                                                      |                                                   |                                        |                                                                                     |                                     |                                                                                                                                                                       |                                                  |                                                                                                                                                                                                                                       |                                                                                                                                                                                                                      |
|--------------------------------------------------------|--------------------------------------------------------------------------------------------------------------------------------------|---------------------------------------------------|----------------------------------------|-------------------------------------------------------------------------------------|-------------------------------------|-----------------------------------------------------------------------------------------------------------------------------------------------------------------------|--------------------------------------------------|---------------------------------------------------------------------------------------------------------------------------------------------------------------------------------------------------------------------------------------|----------------------------------------------------------------------------------------------------------------------------------------------------------------------------------------------------------------------|
| Citation /location                                     | Health Outcome /Analytic variable                                                                                                    | Design/year of data collection (individual level) | Individual sample size (sex/age range) | Individual characteristics adjusted for                                             | Sample size of areas                | Area-level exposures                                                                                                                                                  | Crude between area variation                     | Adjusted between area variation                                                                                                                                                                                                       | Significant adjusted area effects                                                                                                                                                                                    |
| <b>Borrel (2002)</b> <sup>108</sup><br>/Spain          | Mortality all injury (rate);<br>Mortality from (rate):<br>Traffic injury;<br>Falls;<br>Drug overdose;<br>Suicide;<br>Other injuries. | Cross-sectional/<br>1992-1998                     | 4393<br>63% Men<br>> 19y               | E<br><br>Age-sex specific analyses                                                  | 38 City-defined neighbourhoods      | % Unemployed men <sup>d</sup> ,<br>% Men in jail <sup>d</sup> .                                                                                                       | NR                                               | Mortality from all injury<br>Men:<br>0.016<br>(p=0.001)<br>Women:<br>0.027<br>(p<0.001)<br>(also adjusted for % unemployed men);<br>Mortality from drug overdose<br>Women:<br>0.295<br>(p<0.001)<br>(also adjusted for % men in jail) | - Higher % of unemployed men was associated with overall injury mortality, and with mortality from falls among men only.<br>- Higher % of men in jail was associated with greater likelihood of fatal drug overdose. |
| <b>Bosma (2001)</b> <sup>109</sup><br>/The Netherlands | All-cause mortality (rate)                                                                                                           | Cross-sectional/<br>1991                          | 8506<br>% Men NR<br>15-74y             | A, S, E, OS, Health status, Being unemployed or disabled, Severe financial problems | 86<br>Administrative neighbourhoods | % Primary schooling <sup>d</sup> ,<br>% Unskilled manual workers <sup>d</sup> ,<br>% Unemployed/disabled <sup>d</sup> ,<br>% Severe financial problems <sup>d</sup> . | Significant, but no variance estimates reported. | NS                                                                                                                                                                                                                                    | - Greater % of unemployment/disability and presence of severe financial problems were associated with greater all-cause mortality.                                                                                   |
| <b>Curtis (2004)</b> <sup>110</sup><br>/UK             | All-cause mortality (rate)                                                                                                           | Longitudinal<br>/1939; 1981                       | 62719<br>40% Men<br>40-59y             | A, S, SC, MS, ES, Housing tenure                                                    | 192 Categories of residential areas | 1981 Ward of residence: Carstairs Index of deprivation <sup>d</sup> ,<br>Broad regional location <sup>d</sup> .                                                       | NR                                               | NR                                                                                                                                                                                                                                    | - Mortality risks were lower for people originating from affluent areas in 1939 after controlling for 1981 area type.                                                                                                |

|                                                   |                                                                           |                             |                            |                                      |                                                                         |                                                                                                                                                                                                                                                                                                                                                                                                                                                                                                                                                                                                                                                              |    |                                                                                                                                                                              |                                                                                                                                                                                                                                                                                                                                                                                                                                                                                                                                                                                                                                                                                                                                                                                                                                          |
|---------------------------------------------------|---------------------------------------------------------------------------|-----------------------------|----------------------------|--------------------------------------|-------------------------------------------------------------------------|--------------------------------------------------------------------------------------------------------------------------------------------------------------------------------------------------------------------------------------------------------------------------------------------------------------------------------------------------------------------------------------------------------------------------------------------------------------------------------------------------------------------------------------------------------------------------------------------------------------------------------------------------------------|----|------------------------------------------------------------------------------------------------------------------------------------------------------------------------------|------------------------------------------------------------------------------------------------------------------------------------------------------------------------------------------------------------------------------------------------------------------------------------------------------------------------------------------------------------------------------------------------------------------------------------------------------------------------------------------------------------------------------------------------------------------------------------------------------------------------------------------------------------------------------------------------------------------------------------------------------------------------------------------------------------------------------------------|
|                                                   |                                                                           |                             |                            |                                      |                                                                         | 1939 Area of residence:<br>In economic depression <sup>d</sup> ,<br>Population density <sup>d</sup> ,<br>% Population semi-skilled<br>or unskilled manual work <sup>d</sup><br>% Population in<br>overcrowded housing <sup>d</sup> ,<br>Unemployment rate <sup>d</sup> .                                                                                                                                                                                                                                                                                                                                                                                     |    |                                                                                                                                                                              |                                                                                                                                                                                                                                                                                                                                                                                                                                                                                                                                                                                                                                                                                                                                                                                                                                          |
| <b>Franzini<br/>(2003)</b> <sup>111</sup><br>/USA | Years of life<br>lost (YLL)<br>to premature<br>CVD<br>mortality<br>(cont) | Cross<br>Sectional/<br>1991 | 50268<br>% Men NR<br>≥ 25y | S, R/E, Age<br>adjusted<br>education | 12344 Census<br>block groups;<br>3788 Census<br>tracts;<br>247 Counties | Census block groups:<br>Median house value <sup>d</sup><br><br>Census tracts:<br>% College degree <sup>d</sup> ,<br>% Blacks <sup>d</sup> ,<br>% Hispanics <sup>d</sup> ,<br>% Homeownership <sup>d</sup> .<br><br>Counties:<br>% High school diploma <sup>d</sup> ,<br>% Some college <sup>d</sup> ,<br>% College degree <sup>d</sup> ,<br>Median income <sup>d</sup> ,<br>Poverty rate <sup>d</sup> ,<br>Unemployment rate <sup>d</sup> ,<br>% Blacks <sup>d</sup> ,<br>% Hispanics <sup>d</sup> ,<br>% Homeownership <sup>d</sup> ,<br>Crime index <sup>d</sup> ,<br>Income inequality<br>/Robin hood index <sup>i</sup> ,<br>/90/10 ratio <sup>i</sup> . | NR | Block<br>groups: NS<br>Census<br>tracts: 3.10<br>(p<0.05)<br>County: 0.46<br>(p<0.05)<br>(Also<br>adjusted for<br>block group,<br>census tract,<br>and county<br>variables). | <ul style="list-style-type: none"> <li>- Block-group level: Higher median house value was associated with reduced YLL.</li> <li>- Census tract level: Greater % Blacks and % Hispanics were associated with decrease in YLL for Blacks and Hispanics.</li> <li>- County level: Higher % of homeownership was associated with lower YLL, and worse crime index was associated with increased YLL.</li> <li>- Cross-level interactions: Effect of lower crime at the county level and YLL was weaker among women.</li> <li>- Effect of median house value on YLL was greater among high-education individuals.</li> <li>- Effect of county level homeownership on YLL was stronger for Blacks.</li> <li>- Effect of median house value of census block groups on YLL more important in counties with higher % of homeownership.</li> </ul> |
| <b>Hembree<br/>(2005)</b> <sup>112</sup><br>/USA  | Overdose<br>mortality<br>(ratio)                                          | Case-<br>control/<br>1996   | 1178<br>77% Men<br>15-64y  | A, S, R/E                            | 59 Residential<br>community<br>districts                                | (d) Median household<br>income <sup>d</sup> ,<br>(d) N'hood drug use <sup>d</sup> .<br>External built<br>environment - % buildings<br>in:<br>Dilapidated condition <sup>i</sup> ,<br>Deteriorating condition <sup>i</sup> ,<br>External wall problems <sup>i</sup> ,<br>Window problems <sup>i</sup> ,<br>Stairway problems <sup>i</sup> ,<br>Clean streets/sidewalks <sup>i</sup> ,                                                                                                                                                                                                                                                                         | NR | NR                                                                                                                                                                           | <ul style="list-style-type: none"> <li>- All characteristics of the external built environment, except % buildings with any external wall problems, were associated with a higher likelihood of overdose mortality.</li> <li>- Greater % of housing units experiencing toilet breakdowns, needing additional heating in winter, with large areas of peeling plaster or paint were associated with higher likelihood of overdose mortality.</li> </ul>                                                                                                                                                                                                                                                                                                                                                                                    |

|                                               |                                                                                     |                      |                             |                                                                                                                     |                       |                                                                                                                                                                                                                                                                                                                                                                                                  |    |                                                                                            |                                                                                                                                                                                                                                                                                                                                                                                                                         |
|-----------------------------------------------|-------------------------------------------------------------------------------------|----------------------|-----------------------------|---------------------------------------------------------------------------------------------------------------------|-----------------------|--------------------------------------------------------------------------------------------------------------------------------------------------------------------------------------------------------------------------------------------------------------------------------------------------------------------------------------------------------------------------------------------------|----|--------------------------------------------------------------------------------------------|-------------------------------------------------------------------------------------------------------------------------------------------------------------------------------------------------------------------------------------------------------------------------------------------------------------------------------------------------------------------------------------------------------------------------|
|                                               |                                                                                     |                      |                             |                                                                                                                     |                       | Structural fires <sup>1</sup> ,<br>Internal built environment<br>- % housing units with:<br>Toilet breakdowns <sup>1</sup> ,<br>Non-functioning kitchen<br>facilities <sup>1</sup> ,<br>>3 Heat breakdowns in<br>winter <sup>1</sup> ,<br>Additional heating needs<br>in winter <sup>1</sup> ,<br>Large area of peeling<br>plaster/paint <sup>1</sup> ,<br>Internal water leakage <sup>1</sup> . |    |                                                                                            |                                                                                                                                                                                                                                                                                                                                                                                                                         |
| <b>Jaffe (2005)</b> <sup>113</sup><br>/Israel | All-cause (rate);<br>CVD mortality (rate);<br>Non-CVD mortality (rate)              | Follow-up/ 1983-1992 | 141683<br>45% Men<br>45-89y | MS, E, Origin,<br>Continent of origin<br><br>Age-sex specific analyses.                                             | 882 Statistical areas | Religious affiliation <sup>d</sup> ,<br>SES index <sup>d</sup> .                                                                                                                                                                                                                                                                                                                                 | NR | VC (Se):<br>Women: NS<br>Men all ages: 0.020 (0.005)<br>(Also adjusted for area variables) | - Greater deprivation was associated with greater risk of mortality.<br>- Adjusting for area SES, stronger religious affiliation was associated with lower risk of all-cause mortality and CVD mortality among men and women, and with lower risk of non-CVD mortality among men only.<br>- Area-level interaction: In lower and average SES areas, religious affiliation was protective of mortality among women only. |
| <b>Jaffe (2005)</b> <sup>114</sup><br>/Israel | All-cause mortality (rate)                                                          | Follow-up/ 1983-1992 | 131156<br>45% Men<br>45-89y | MS, E, I,<br>Origin,<br>Number of rooms in the house,<br>Household amenities score<br><br>Age-sex specific analyses | 882 Statistical areas | SES index <sup>d</sup>                                                                                                                                                                                                                                                                                                                                                                           | NR | VC (Se)<br>Women 45-69y: 0.023 (0.010)                                                     | - Greater deprivation was associated with greater risk of mortality..<br>- Cross-level interaction: Effect of deprivation on mortality risks were lower among low-income men in the 45-69 y group, and higher among high-income men in the 70-89 y group.                                                                                                                                                               |
| <b>Jerrett (2005)</b> <sup>115</sup><br>/USA  | All cause mortality (rate)<br>Mortality by (rate):<br>Ischemic heart disease (IHD); | Follow-up/ 1982-2000 | 22905<br>% Men NR<br>Age NR | 44 individual variables:<br>demographics, lifestyle, dietary, occupation, education                                 | 267 Zip Code areas    | Income <sup>d</sup> ,<br>Income inequality <sup>d</sup> ,<br>Education <sup>d</sup> ,<br>Population size <sup>d</sup> ,<br>Racial composition <sup>d</sup> ,<br>Unemployment <sup>d</sup> ,<br>Potential exposure misclassification <sup>1</sup> ,                                                                                                                                               | NR | NR                                                                                         | - Greater concentration levels of PM <sub>2.5</sub> and O <sub>3</sub> , and presence of highway intersection were associated with greater risk of all-cause mortality, and with mortality from IHD, cardiopulmonary diseases, and with diseases of the endocrine and digestive systems.                                                                                                                                |

|                                                  |                                                                                                                                                                                           |                                                         |                                                                                        |                                                                                              |                                |                                                                                                                                                                                             |         |         |                                                                                                                                                                                                                                                                                                                                                                                                                    |
|--------------------------------------------------|-------------------------------------------------------------------------------------------------------------------------------------------------------------------------------------------|---------------------------------------------------------|----------------------------------------------------------------------------------------|----------------------------------------------------------------------------------------------|--------------------------------|---------------------------------------------------------------------------------------------------------------------------------------------------------------------------------------------|---------|---------|--------------------------------------------------------------------------------------------------------------------------------------------------------------------------------------------------------------------------------------------------------------------------------------------------------------------------------------------------------------------------------------------------------------------|
|                                                  | Cardiopulmonary;<br>Lung cancer;<br>Digestive cancer;<br>Other cancers;<br>Endocrine;<br>Diabetes;<br>Digestive;<br>Male accidents;<br>Females accidents;<br>All others                   |                                                         |                                                                                        |                                                                                              |                                | % Air conditioning <sup>i</sup> ,<br>Particulate matter (PM <sub>2.5</sub> ) <sup>i</sup> ,<br>Ozone (O <sub>3</sub> ) <sup>i</sup> ,<br>Intersection with highway <sup>i</sup> .           |         |         | - When further adjusting for area SES, social factors, and % air conditioning, the effect of air pollution on all-cause and cause-specific mortality was no longer significant.                                                                                                                                                                                                                                    |
| <b>Lochner (2003)</b> <sup>116</sup><br>/USA     | All cause mortality (rate);<br>Mortality by (rate):<br>Heart disease;<br>Cancer;<br>Other causes                                                                                          | Cross-sectional/<br>1994-1996                           | Sample size NR<br>68% Men<br>45-64y                                                    | A<br><br>Sex-race specific analyses                                                          | 342<br>Neighbourhood clusters  | % Perceived reciprocity <sup>d</sup> ,<br>% Perceived trust <sup>d</sup> ,<br>Associational membership per capita <sup>d</sup> ,<br>Composite index of economic disadvantage <sup>d</sup> . | NR      | NR      | - Greater economic disadvantage was associated with higher risk of all-cause mortality and mortality from heart disease, and with mortality from "other causes" except among Black men.<br>- Higher levels of reciprocity, trust, and civic participation were associated with lower risk of all-cause mortality and mortality from "other causes", and with lower mortality from heart disease among Whites only. |
| <b>Marinacci (2004)</b> <sup>117</sup><br>/Italy | All cause mortality (rate);<br>Mortality by (rate):<br>Diabetes;<br>Stomach cancer;<br>Lung cancer;<br>Psychol discomfort;<br>CHD;<br>Cerebro-vascular diseases;<br>Respiratory diseases. | Longitudinal<br>/1971-1980;<br>1981-1991;<br>1991-1999. | 1971/80:<br>799564;<br>1981/91:<br>889432;<br>1991/99:<br>821736.<br>% Men NR<br>≥ 15y | E, Place of birth,<br>Composite index of housing conditions<br><br>Sex-age specific analyses | 23 City-defined neighbourhoods | Neighbourhood Deprivation index <sup>d</sup>                                                                                                                                                | NR      | NR      | - Greater deprivation was associated with higher risk of mortality.<br>- Cross-level interactions: Effect of deprivation on mortality by coronary heart and respiratory diseases was greater among women and men aged 15 to 64 years; deprivation increased risk of mortality by cerebrovascular diseases but only among women.                                                                                    |
| <b>Martikainen</b>                               | All cause                                                                                                                                                                                 | Follow-up/                                              | 251509                                                                                 | E, SC, Housing                                                                               | 55 City-defined                | % Manual workers <sup>d</sup> ,                                                                                                                                                             | Average | Average | - Greater % of manual workers was                                                                                                                                                                                                                                                                                                                                                                                  |

|                                              |                                                                                                                                                                                      |                                                                           |                                                                   |                                                                                                                        |                                                          |                                                                                                                                                                                                                                                                                                                                                                                                                                                                                                                                                                                               |                                                                                                                                                                                 |                                                               |                                                                                                                                                                                                                                                                                                                                                                                                                                                                                                                                                                              |
|----------------------------------------------|--------------------------------------------------------------------------------------------------------------------------------------------------------------------------------------|---------------------------------------------------------------------------|-------------------------------------------------------------------|------------------------------------------------------------------------------------------------------------------------|----------------------------------------------------------|-----------------------------------------------------------------------------------------------------------------------------------------------------------------------------------------------------------------------------------------------------------------------------------------------------------------------------------------------------------------------------------------------------------------------------------------------------------------------------------------------------------------------------------------------------------------------------------------------|---------------------------------------------------------------------------------------------------------------------------------------------------------------------------------|---------------------------------------------------------------|------------------------------------------------------------------------------------------------------------------------------------------------------------------------------------------------------------------------------------------------------------------------------------------------------------------------------------------------------------------------------------------------------------------------------------------------------------------------------------------------------------------------------------------------------------------------------|
| <b>(2003)</b> <sup>118</sup><br>/Finland     | mortality (rate);<br>Mortality by (rate):<br>Lung cancer;<br>Other cancers;<br>Disease of circulatory system;<br>Other diseases;<br>Accidents/violence;<br>Alcohol-related mortality | 1991-1995                                                                 | Men only<br>≥ 25y                                                 | tenure, MS, Housing density<br><br>Age-specific analyses                                                               | neighbourhoods                                           | % People aged > 60y <sup>d</sup> ,<br>Social cohesion <sup>d</sup> .                                                                                                                                                                                                                                                                                                                                                                                                                                                                                                                          | relative deviation i.e. how many % on average does the mortality rate of an area differs from total mortality rate:<br>25-64y = 16.6%<br>Over 64y = 8.1 %<br>SNR (Age adjusted) | relative deviation<br>25-64y = 4.1%<br>Over 64y = 2.6%<br>SNR | associated with higher risk of all-cause mortality, higher risk of mortality from CVD, accident/violence, and alcohol in the 25-64y group, and with higher risk of mortality from CVD in the ≥ 65y group.<br>- Lower social cohesion was associated with higher risk of all cause mortality and mortality from accident/violence and alcohol in the 25-64y group only.<br>- Cross-level interaction: In the ≥ 65y group, those with lower education had higher risk of mortality in areas with both high and low % of manual workers and in areas with high social cohesion. |
| <b>Mohan (2005)</b> <sup>119</sup><br>/UK    | Overall mortality (rate)                                                                                                                                                             | Follow-up/<br>1984/85-<br>2001                                            | 7578<br>% Men NR<br>Age NR                                        | A, S, SC, Housing tenure, Smoking, PA, Diet, Social capital (feel part of community, people to rely upon, feel lonely) | 396 Electoral wards;<br>198 Parliamentary constituencies | Carstairs deprivation index <sup>d</sup> ,<br>% In voluntary activity <sup>d</sup> ,<br>% Core volunteers <sup>d</sup> ,<br>% Social activity <sup>d</sup> ,<br>% Altruistic activity <sup>d</sup> ,<br>% Political activity <sup>d</sup> ,<br>% Voters in last election <sup>d</sup> ,<br>% Thinking local friends are important <sup>d</sup> ,<br>% Belonging to n'hood <sup>d</sup> ,<br>% Would work to improve n'hood <sup>d</sup> ,<br>% Talking to neighbours <sup>d</sup> ,<br>% Feeling the local area is friendly <sup>d</sup> ,<br>Standardised blood donation rate <sup>d</sup> . | NR                                                                                                                                                                              | NR                                                            | - Greater deprivation and lower % of persons involved in voluntary, core volunteering, social, altruistic, and political activities were associated with higher risk of mortality, but in separate models only.                                                                                                                                                                                                                                                                                                                                                              |
| <b>Roos (2004)</b> <sup>120</sup><br>/Canada | Overall mortality (rate)                                                                                                                                                             | Follow-up/<br>Nova Scotia:<br>1990-1999;<br>Manitoba:<br>1996/97-<br>2002 | Nova Scotia:<br>2116<br>48% Men<br>18-75y<br><br>Manitoba<br>8032 | A, S, I, E, Smoking, Diabetes, BMI, Residential mobility                                                               | Census enumeration areas                                 | Household income <sup>d</sup> ,<br>Dwelling value <sup>1</sup> ,<br>% Education < grade 9 <sup>d</sup> ,<br>Unemployment rate <sup>d</sup> ,<br>% Single mother <sup>d</sup> .                                                                                                                                                                                                                                                                                                                                                                                                                | NR                                                                                                                                                                              | NR                                                            | - No significant main area effects.<br>- Cross-level interaction: For Manitoba only, lower income individuals had greater mortality risk in more affluent areas than in less affluent areas.                                                                                                                                                                                                                                                                                                                                                                                 |

|                                                  |                          |                                  |                                                                                                                         |                                                                                |                                                |                                                                                                                                                                                                                                                                                                                                                                                      |    |                                                                                        |                                                                                                                                                                                                                                                                                                                                                                                         |
|--------------------------------------------------|--------------------------|----------------------------------|-------------------------------------------------------------------------------------------------------------------------|--------------------------------------------------------------------------------|------------------------------------------------|--------------------------------------------------------------------------------------------------------------------------------------------------------------------------------------------------------------------------------------------------------------------------------------------------------------------------------------------------------------------------------------|----|----------------------------------------------------------------------------------------|-----------------------------------------------------------------------------------------------------------------------------------------------------------------------------------------------------------------------------------------------------------------------------------------------------------------------------------------------------------------------------------------|
|                                                  |                          |                                  | 47% Men<br>18-75y                                                                                                       |                                                                                |                                                |                                                                                                                                                                                                                                                                                                                                                                                      |    |                                                                                        |                                                                                                                                                                                                                                                                                                                                                                                         |
| <b>Subramanian (2005)</b> <sup>121</sup><br>/USA | Overall mortality (rate) | Cross-sectional/<br>1989-1991    | 79813 cells (6016425 individuals grouped in 79813 cells cross-tabulated by age, sex, race/ethnicity)<br>% Men NR<br>≥0y | A, S, R/E                                                                      | 5532 Census block groups<br>1307 Census tracts | % Population living below poverty line in the census tracts <sup>d</sup>                                                                                                                                                                                                                                                                                                             | NR | Census tracts:<br>Blacks<br>VC = 0.524 (p < 0.001)<br>Whites<br>VC = 0.085 (p < 0.001) | - Greater poverty was associated with higher mortality risk especially among Blacks.<br>- Poverty accounted for racial/ ethnic-specific heterogeneity in mortality at the census tract level.                                                                                                                                                                                           |
| <b>Veuglers (2001)</b> <sup>122</sup><br>/Canada | Overall mortality (rate) | Follow-up/<br>1990-1999          | 2116<br>48% Men<br>18-75y                                                                                               | A, S, E, I,<br>Smoking,<br>Diabetes, BMI                                       | 705 Census enumeration areas                   | Household income <sup>d</sup> ,<br>Dwelling value <sup>i</sup> ,<br>% Education < grade 9 <sup>d</sup> ,<br>Unemployment rate <sup>d</sup> ,<br>% Single mother <sup>d</sup>                                                                                                                                                                                                         | NR | NR                                                                                     | - No significant main area effects.<br>- Cross-level interaction: Within affluent area only, mortality risks were lower among high-income individuals.                                                                                                                                                                                                                                  |
| <b>Waitzman (1999)</b> <sup>123</sup><br>/USA    | Overall mortality (rate) | Follow-up/<br>1986-1994;<br>1995 | 136956<br>% Men NR<br>35-65y                                                                                            | A, R/E, E, I                                                                   | 34 Metropolitan areas                          | Spatial inequality/<br>economic segregation <sup>d</sup> ,<br>Income inequality/Gini coefficient <sup>i</sup> ,<br>Median income <sup>d</sup> .                                                                                                                                                                                                                                      | NR | NR                                                                                     | - Greater economic segregation and income inequality were associated with greater risk of mortality.                                                                                                                                                                                                                                                                                    |
| <b>Yen (1999)</b> <sup>124</sup><br>/USA         | Overall mortality (rate) | Follow-up/<br>1983; 1994         | 996<br>43% Men<br>36-96 y                                                                                               | A, S, R/E,<br>Smoking, BMI,<br>Alcohol consumption,<br>Perceived health status | Census tracts                                  | Social environment score:<br>Population SES:<br>Per capita income <sup>d</sup> ,<br>% White-collar employees <sup>d</sup> ,<br>% Crowding <sup>d</sup> ,<br>Commercial stores per 1000 people <sup>i</sup> ,<br>Environment/housing:<br>Population size <sup>d</sup> ,<br>Area (square miles) <sup>i</sup> ,<br>% Renters <sup>d</sup> ,<br>% Single-family dwellings <sup>d</sup> . | NR | NR                                                                                     | - Poorer social environment was associated with higher risk of mortality.<br>- Lower population SES, lower environment/housing score, and more commercial stores were associated with higher risk of mortality.<br>- Cross-level interactions: Lower environment/housing score and higher population SES were associated with greater risk of mortality among lower income individuals. |
